# Supplementary material for: Efficient correction of Duchenne muscular dystrophy mutations by SpCas9 and dual gRNAs
Source: PubMed Central journal article supplement — Mol Ther Nucleic Acids. 2021 Mar 13;24:403–15. doi: 10.1016/j.omtn.2021.03.005 (PMC8039775; doi:10.1016/j.omtn.2021.03.005), 2021-03-13
Supplement: mmc1.pdf [file mmc1.pdf]

**OMTN, Volume 24**

**Supplemental information**

**Efficient correction of Duchenne**

**muscular dystrophy mutations**

**by SpCas9 and dual gRNAs**

**Xi Xiang, Xiaoying Zhao, Xiaoguang Pan, Zhanying Dong, Jiaying Yu, Siyuan Li, Xue Liang, Peng Han, Kunli Qu, Jonas Brorson Jensen, Jean Farup, Fei Wang, Trine Skov Petersen, Lars Bolund, Huajing Teng, Lin Lin, and Yonglun Luo**

### HEK293T

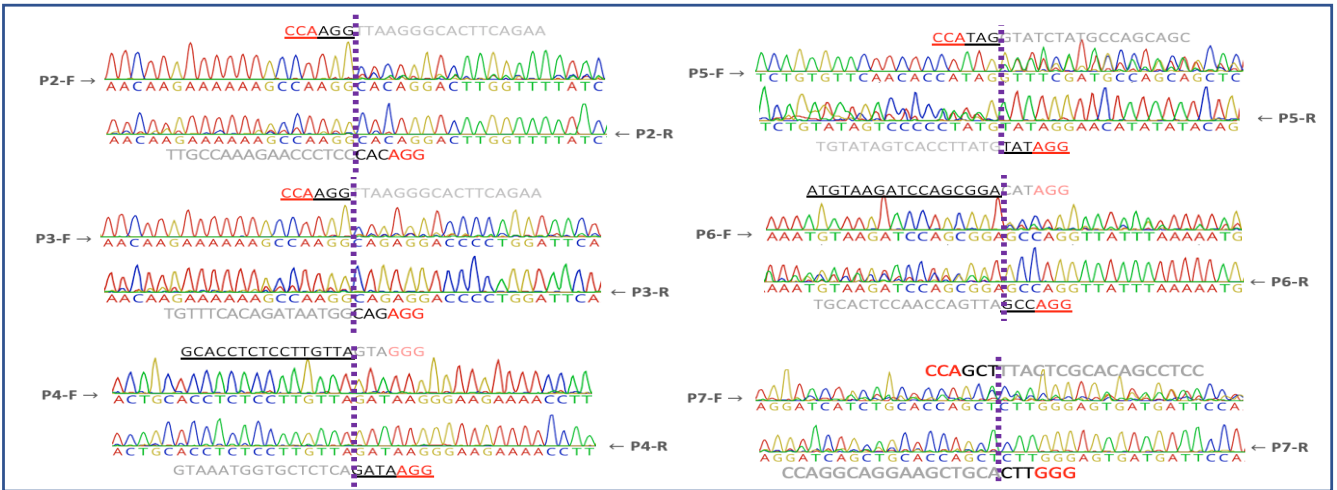

### Hela

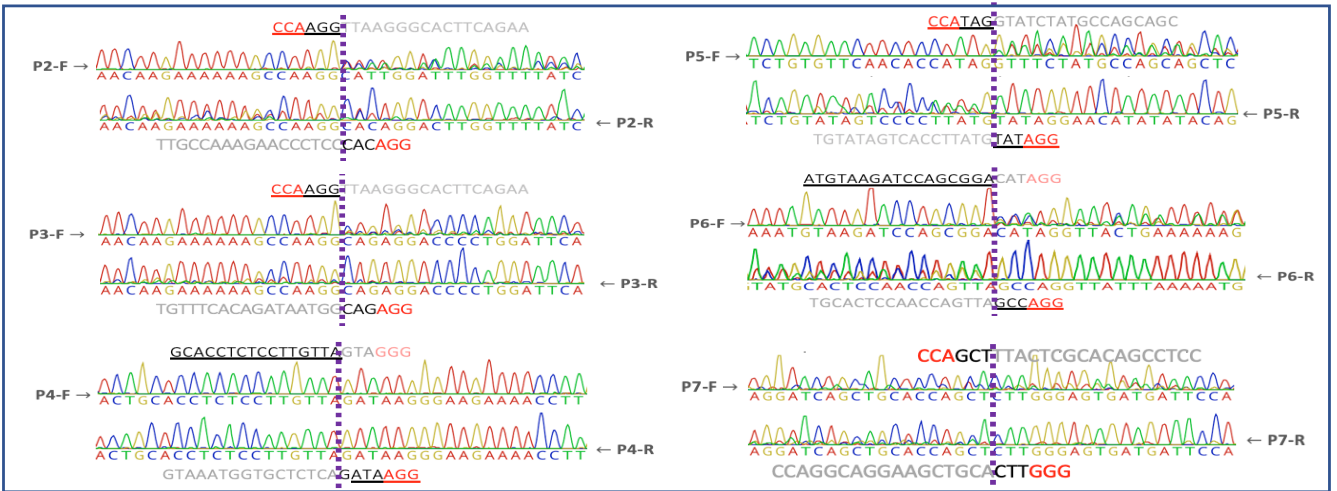

### HepG2

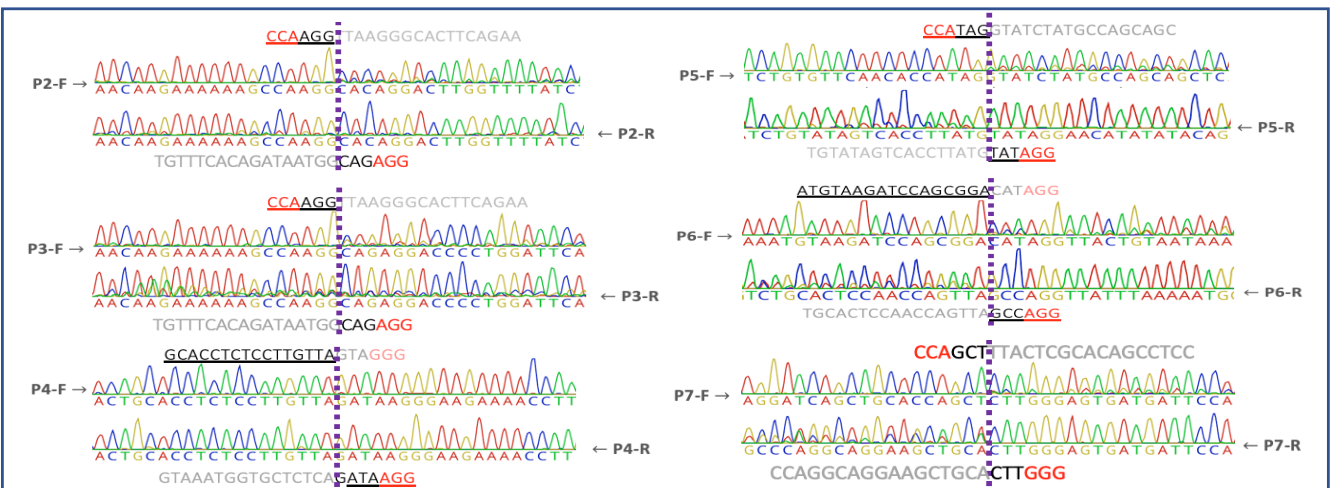

**Figure S1.**

Sanger sequencing results of the additional 6 loci after pair-gRNAs cleavage in three human cell lines.



# P3 73.7%

## CAAGAAAAAGCCAAGGCAGAGG

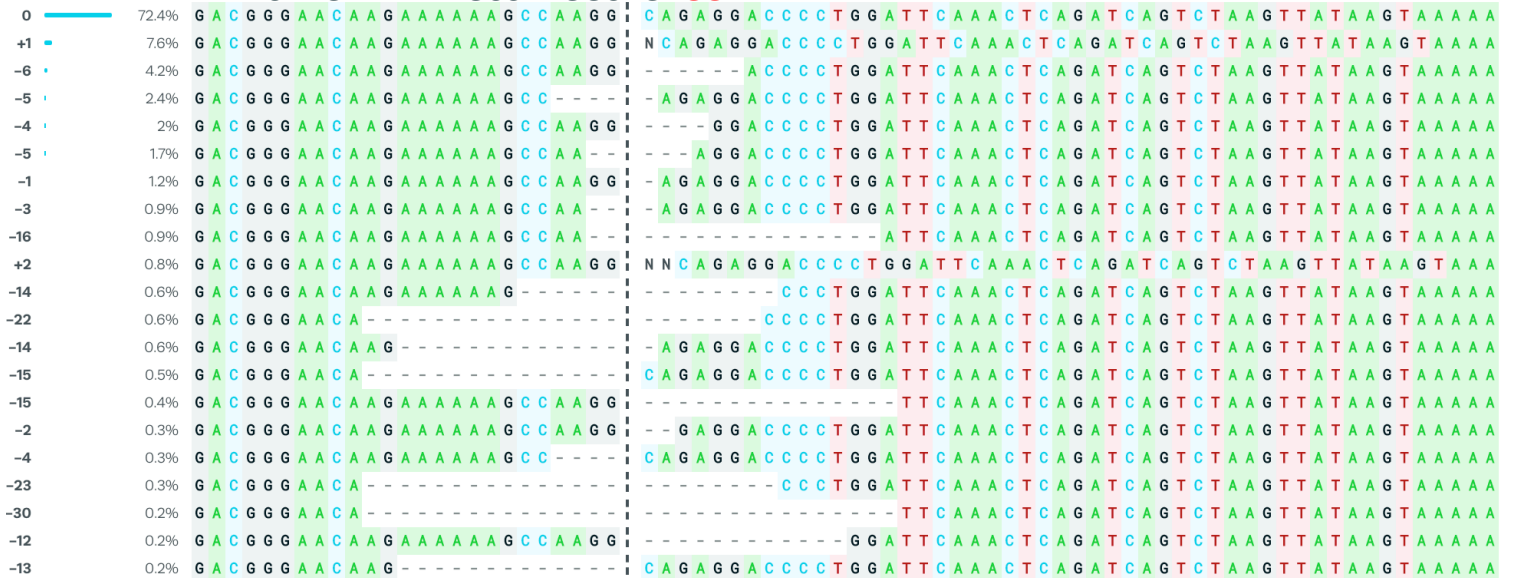

# P5 28.8%

## TGTGTTCAACACCATAGTATAGG

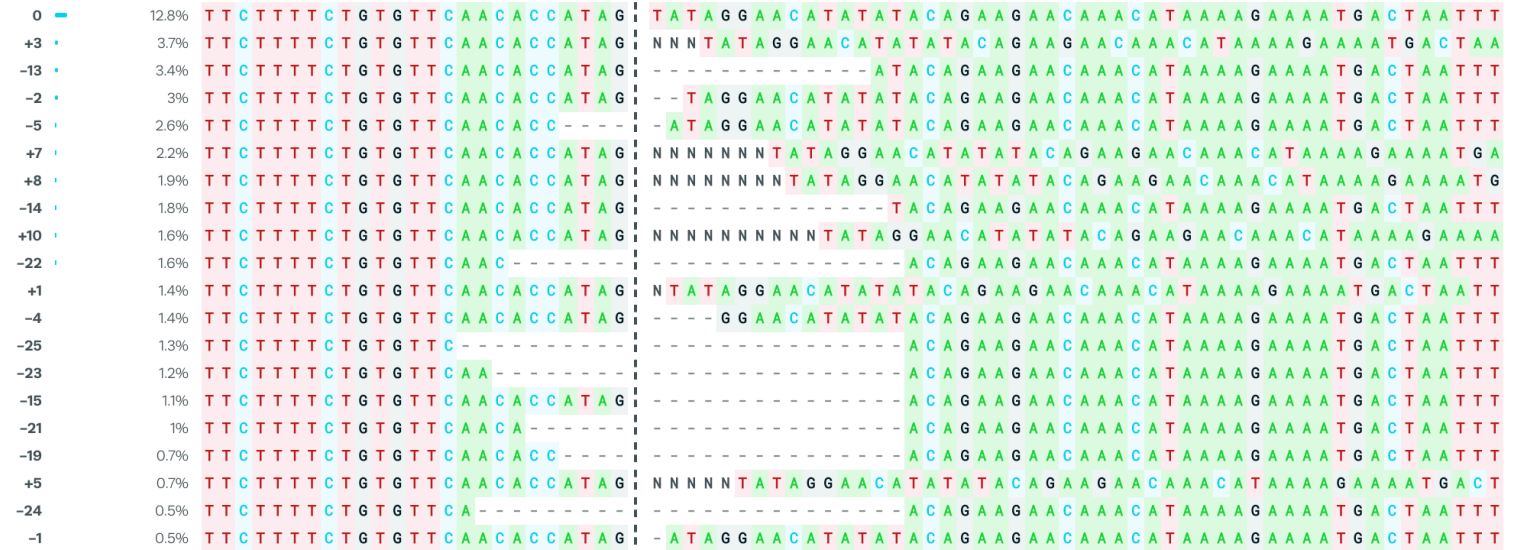

# P6 64.8%

## ATGTAAGATCCAGCGGAGCCAGG

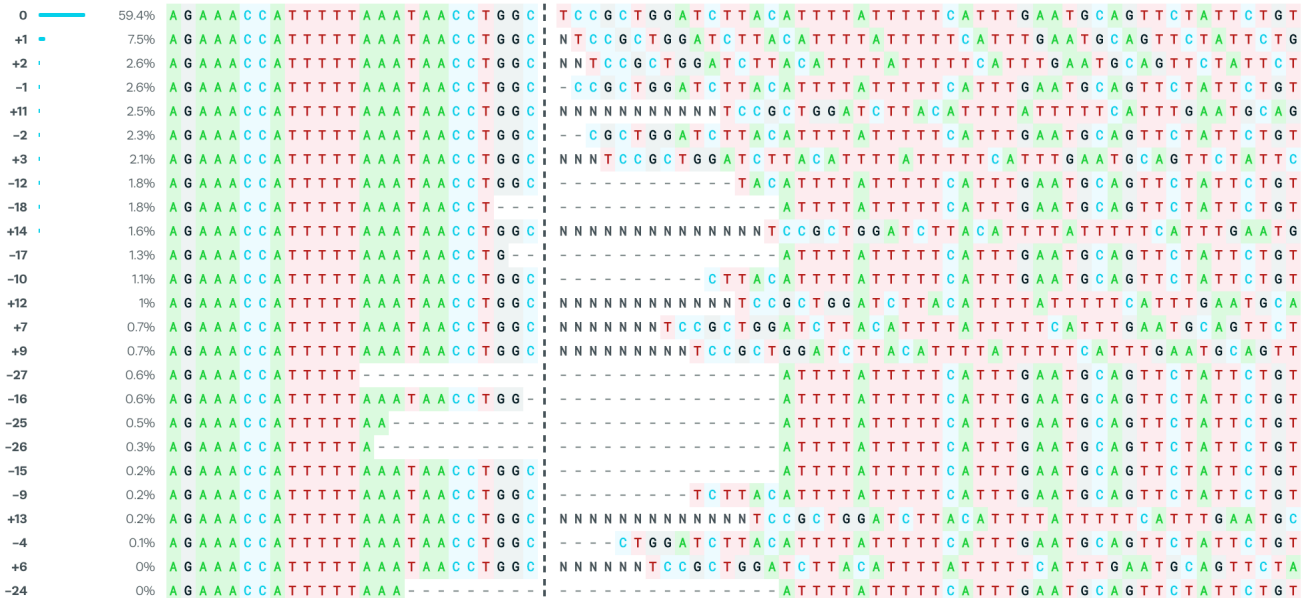

# P4 87.4%

GCACCTCTCCTTGTTAGATAAGG

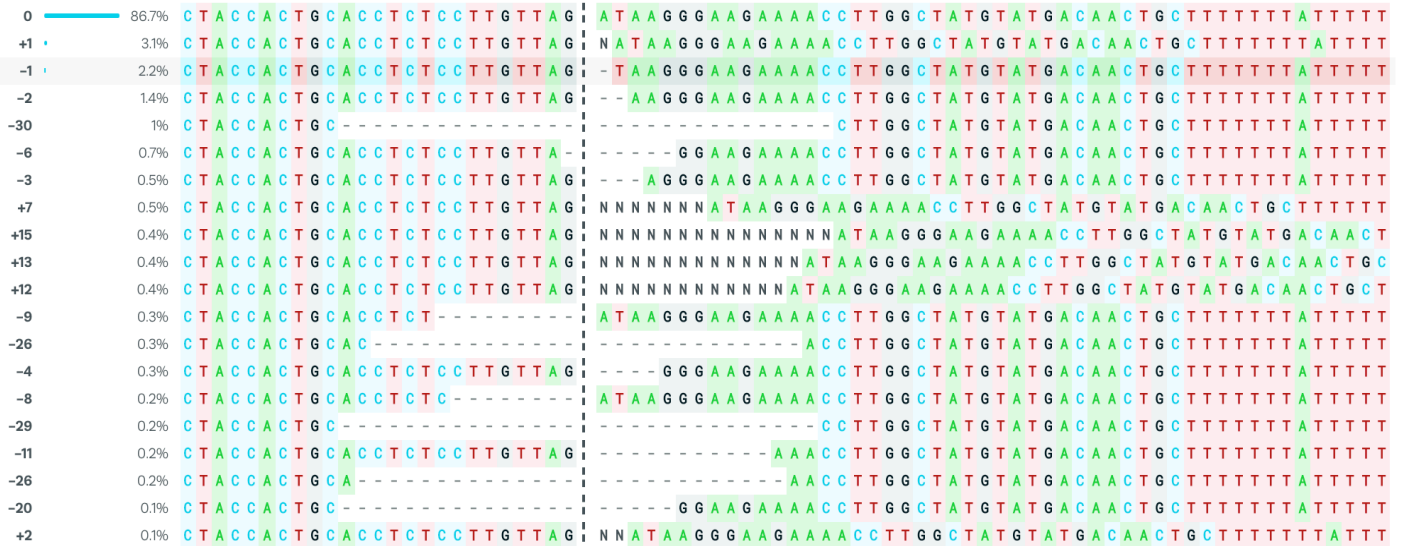

# P7 32.1%

GATCAGCTGCACCAGCTCTGGG

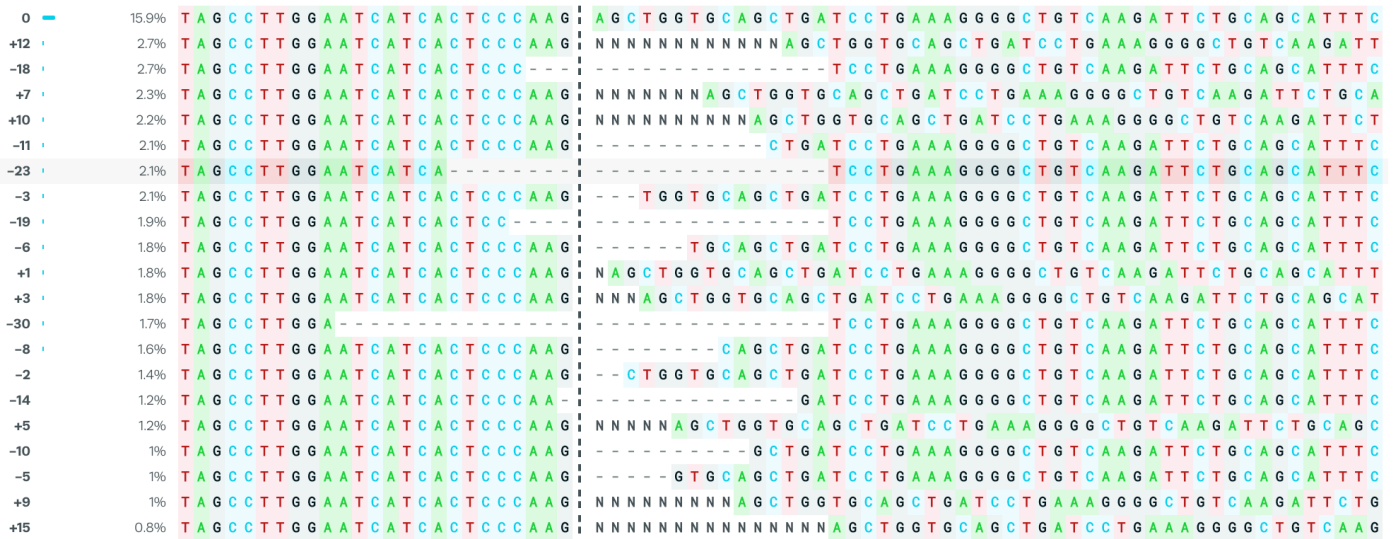

# P8

76.5%

TGGTGAGTTTCCCCTTGGGCAAG

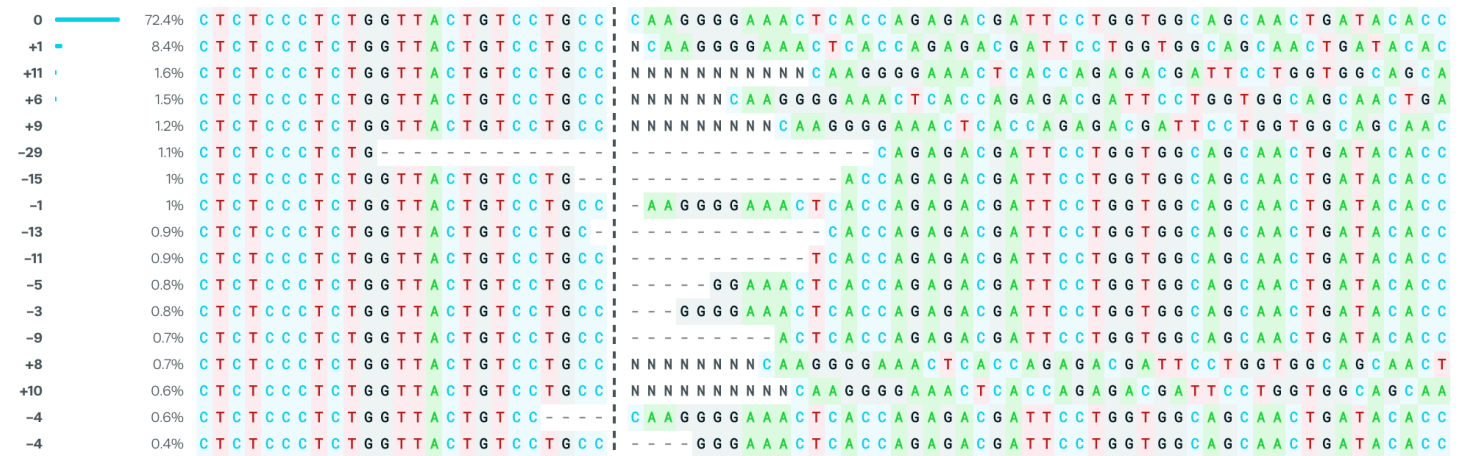

# Hela

P1 61.1%

CAAGAAAAAGCCAAGGAAGAGG

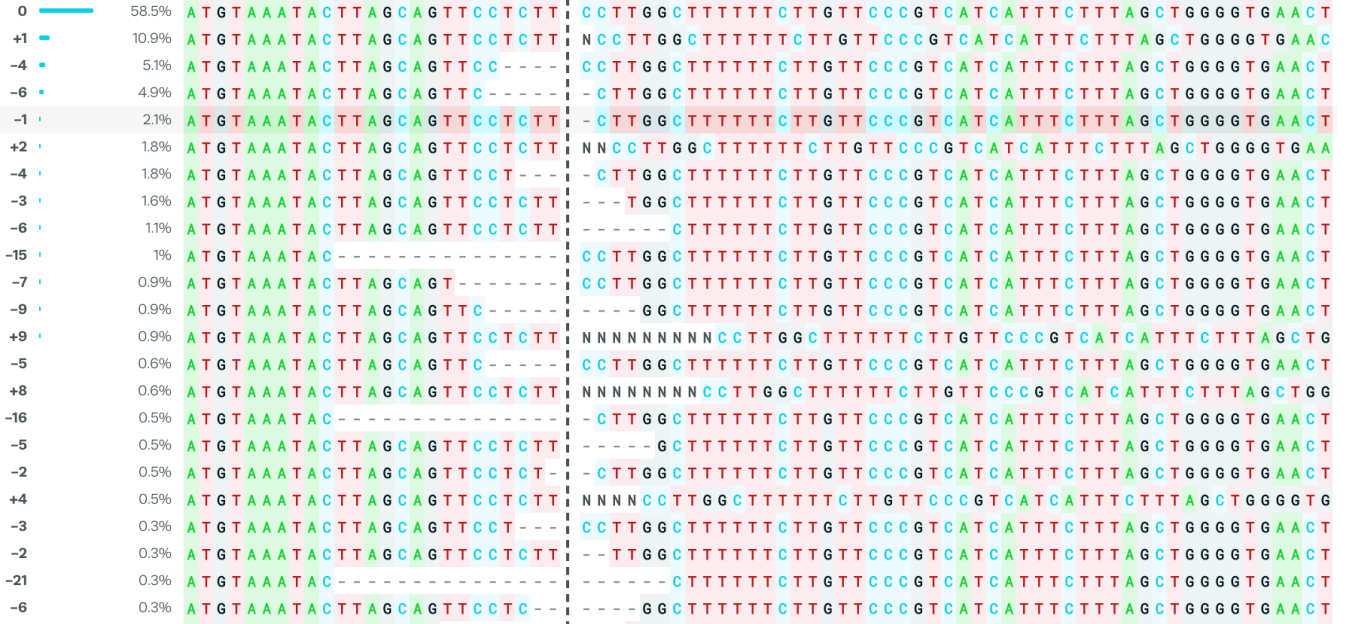

P2 55.0%

CAAGAAAAAGCCAAGGCACAGG

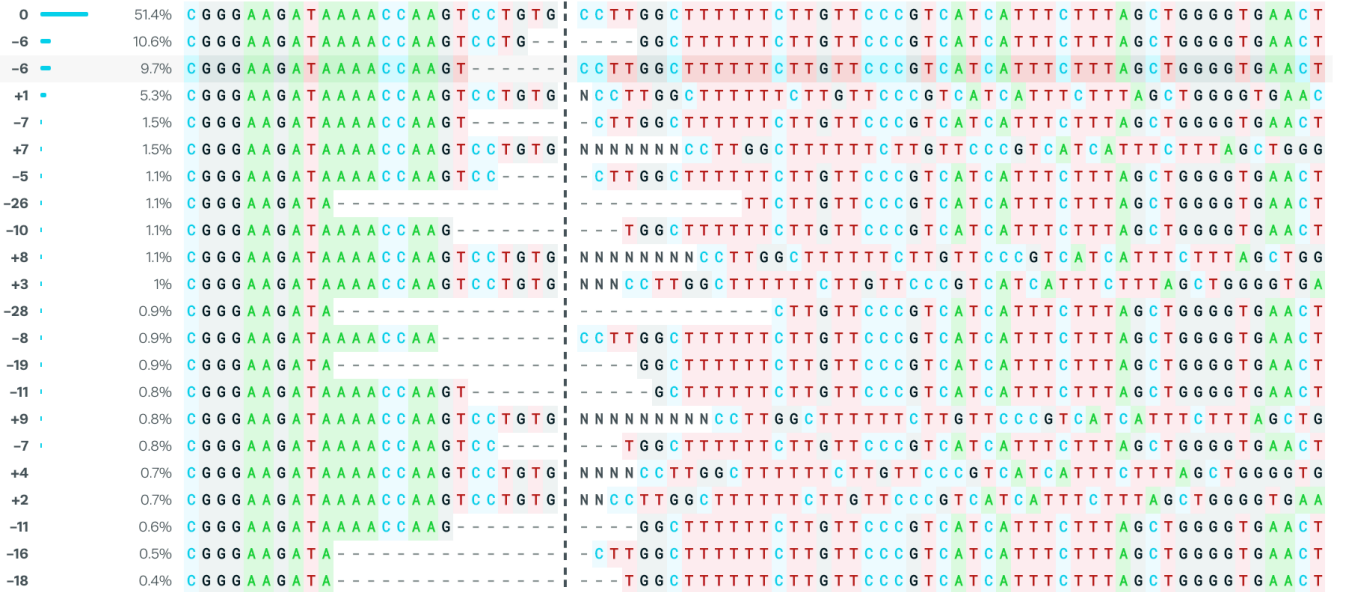

# P3 71.6

## CAAGAAAAAGCCAAGGCAGAGG

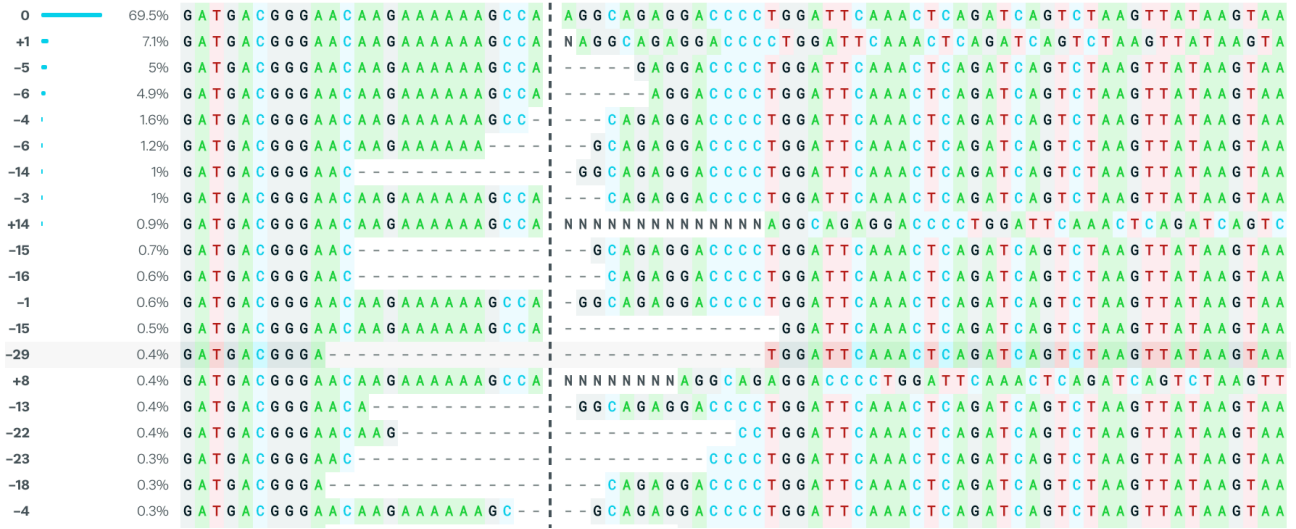

# P5 24.0%

## TGTGTTCAACCCATAGTATAGG

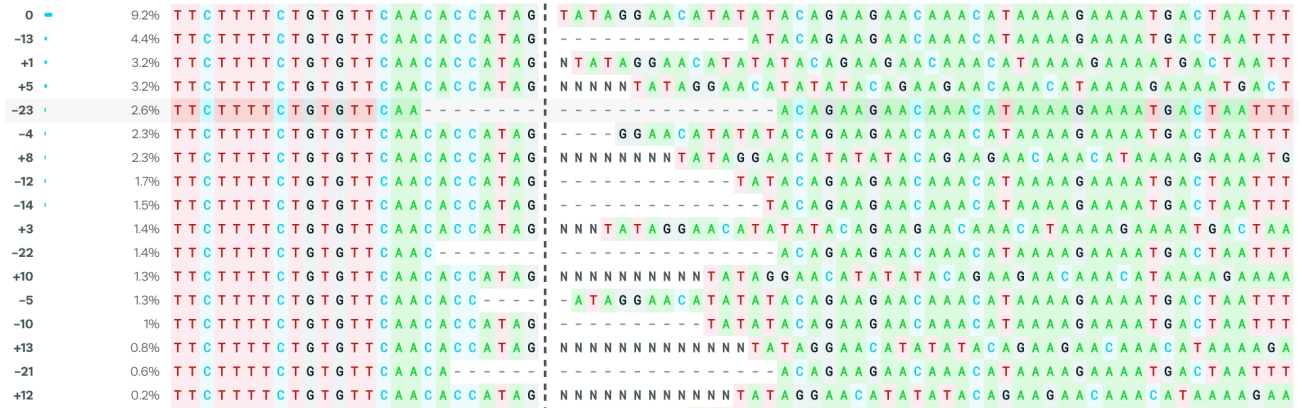

# P4 92.3%

## GCACCTCCTTGTTAGATAAGG

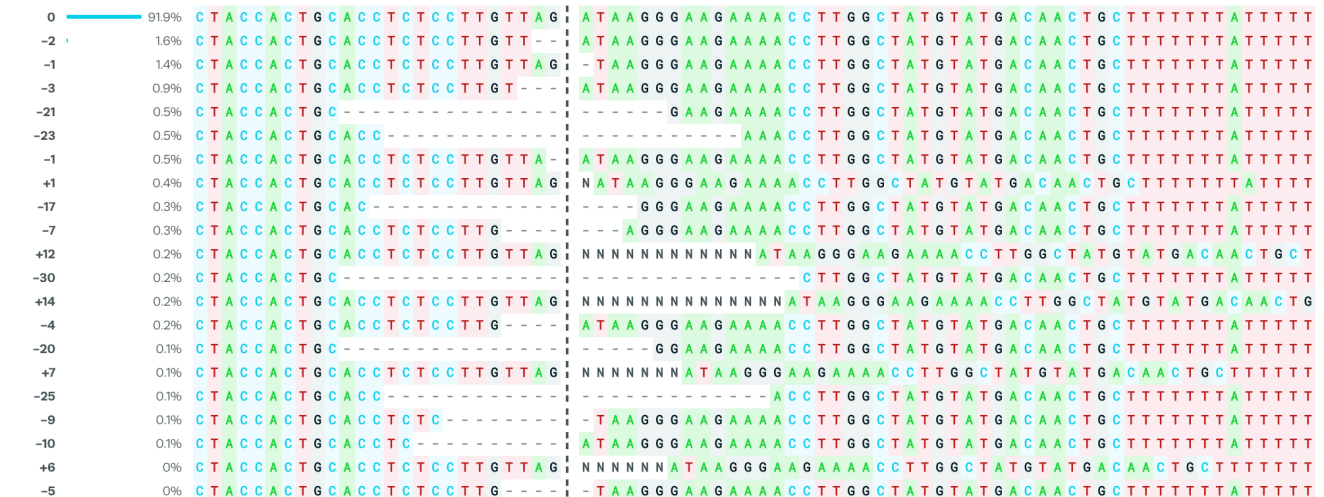

# P6

## 29.4% ATGTAAGATCCAGCGGAGCCAGG

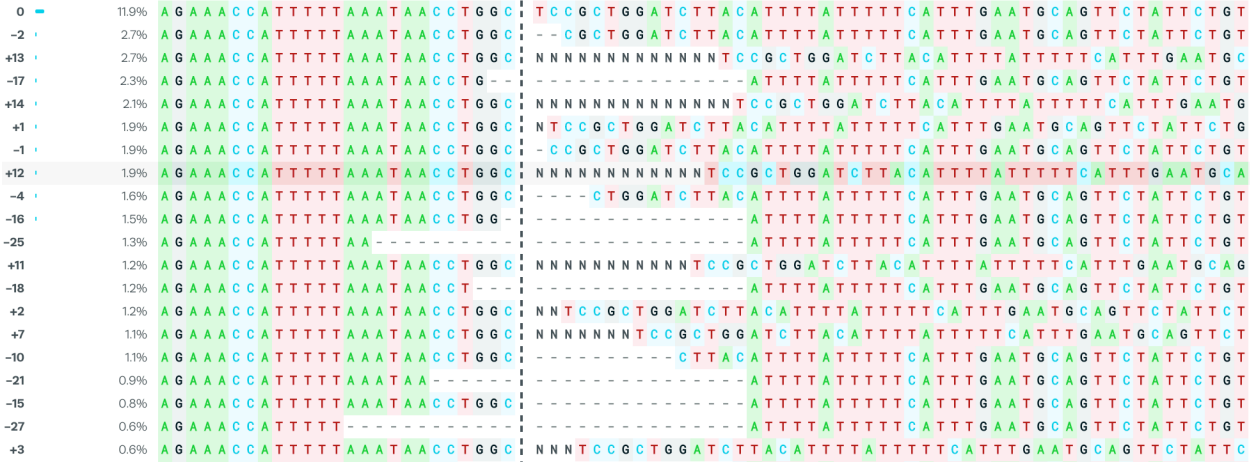

# P7 32.6% GATCAGCTGCACCAGCTCTGGG

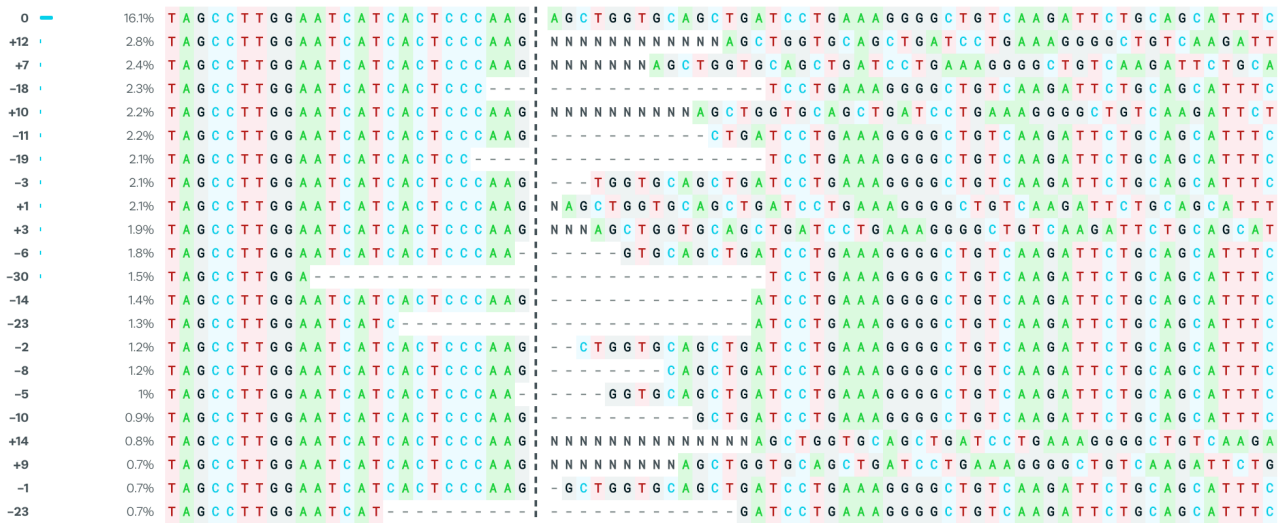

# P8

## 66.4% TGGTGAGTTTCCCCTGGGCAAGG

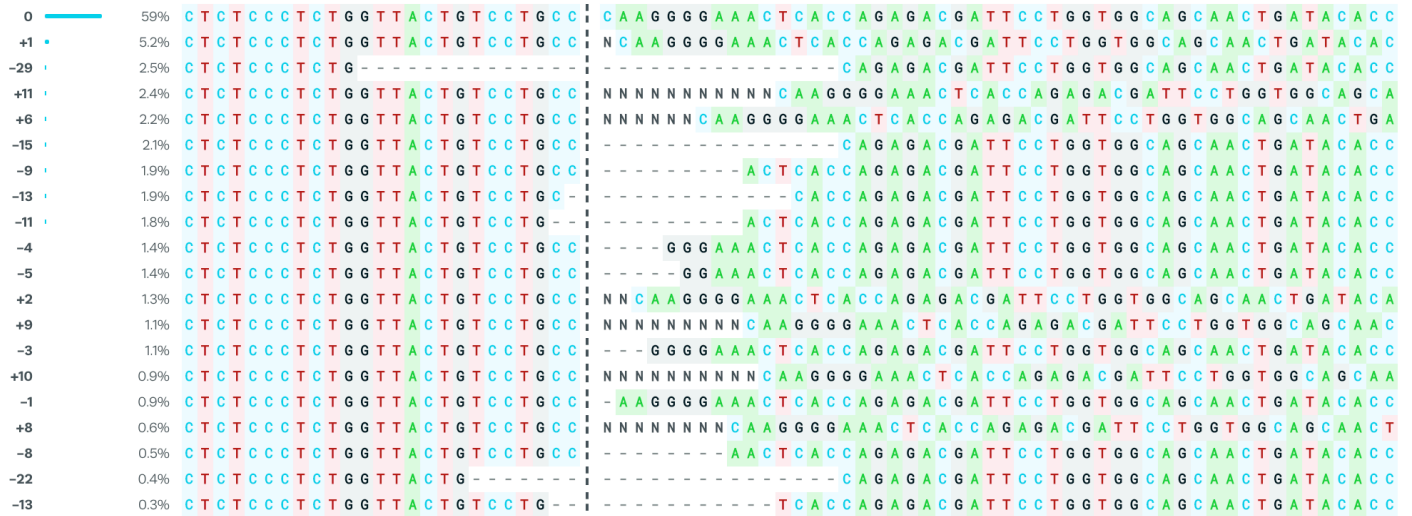







**P7 23.9%**

**GATCAGCTGCACCAGCTCTTGGG**

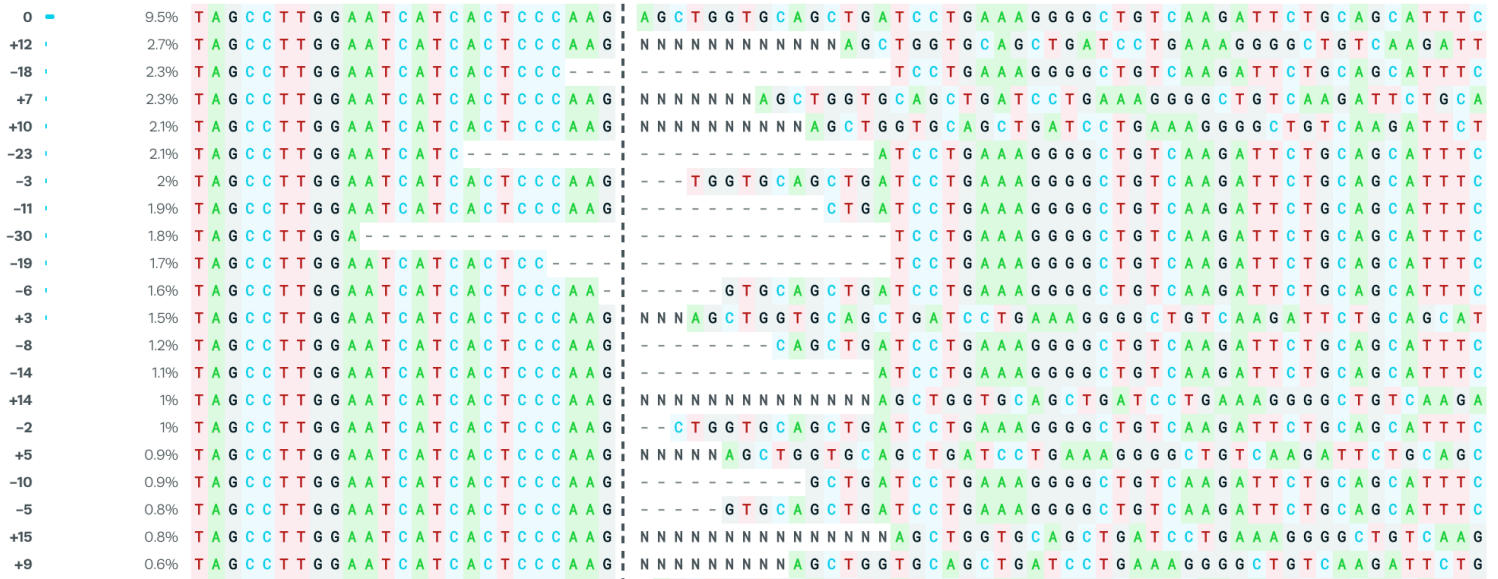

**P8**

**83.1%**

**TGGTGAGTTTCCCCTTGGGCAGG**

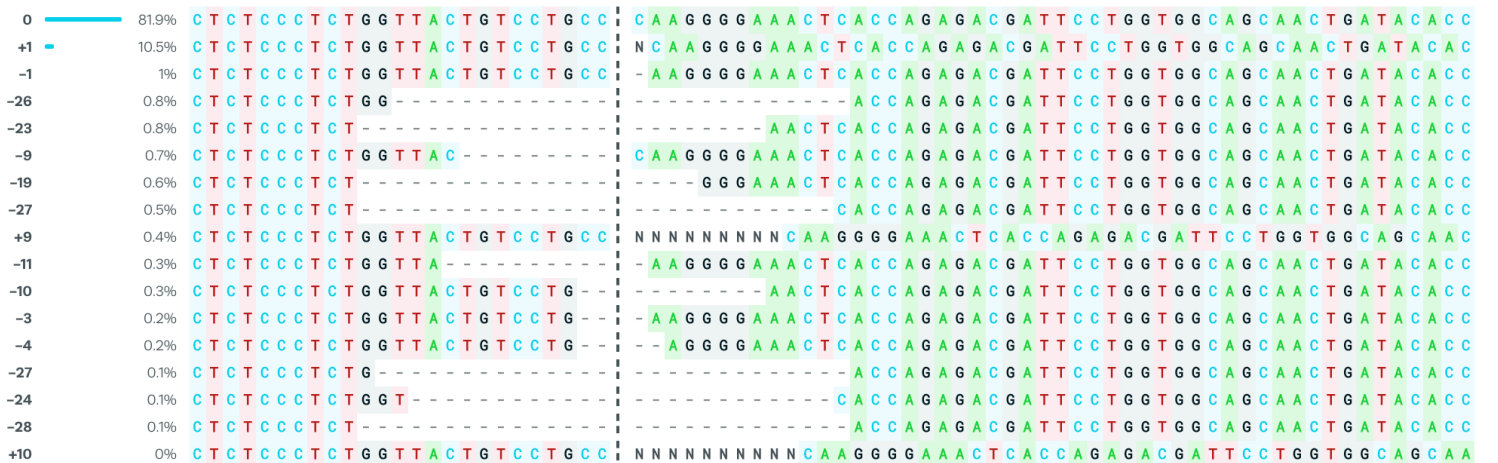

### Figure S2

ICE analysis results of repair outcomes of 8 loci after SpCas9 and dual gRNAs cleavage in three human cell lines (HEK293T, Hela and HepG2). The estimated NHBEJ frequency was calculated as the normalized proportion of the blunt end joining indel divided to the sum of significantly deconvoluted indels.

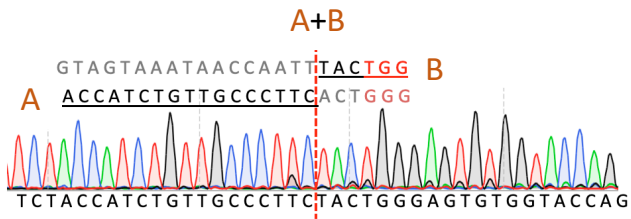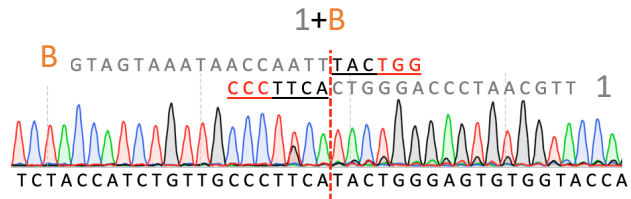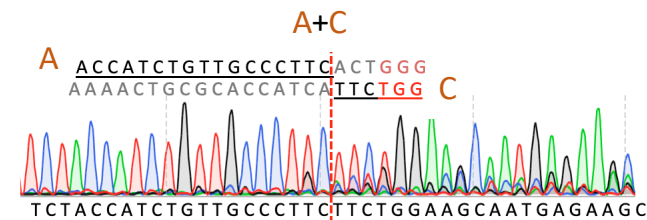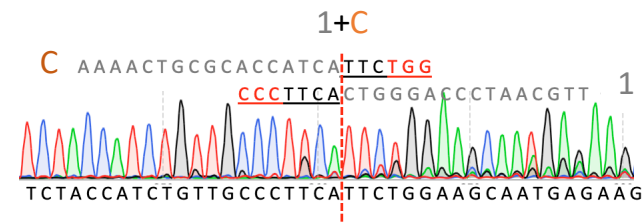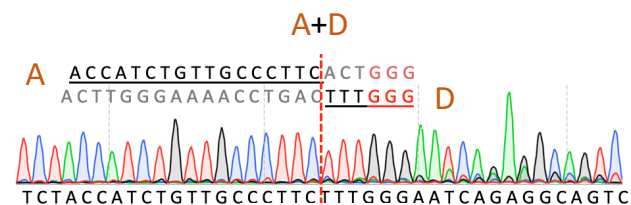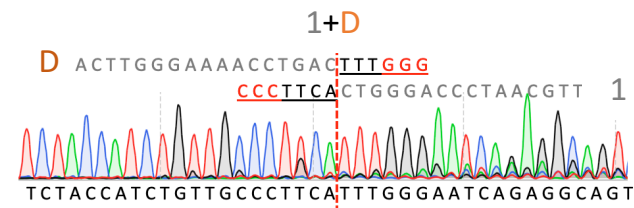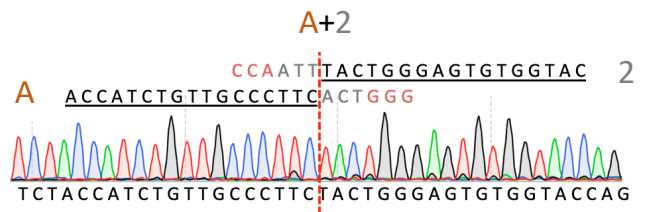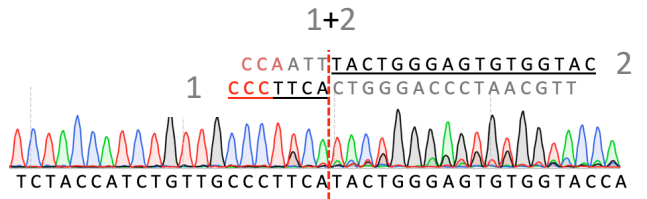

**A+3**

**ND**

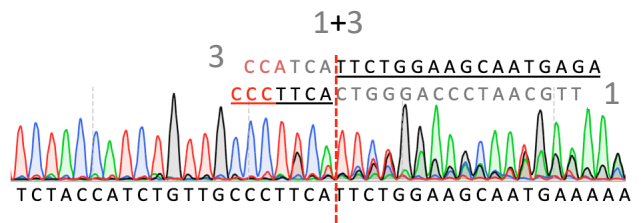

**A+4**

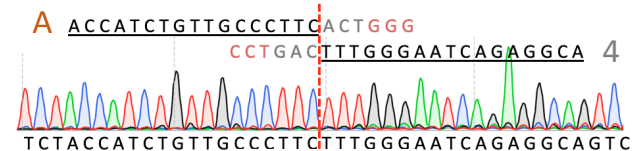

**1+4**

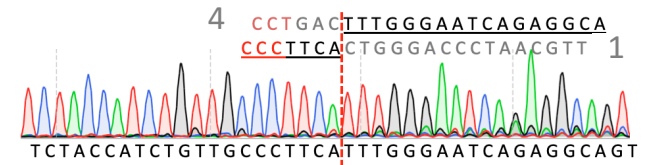

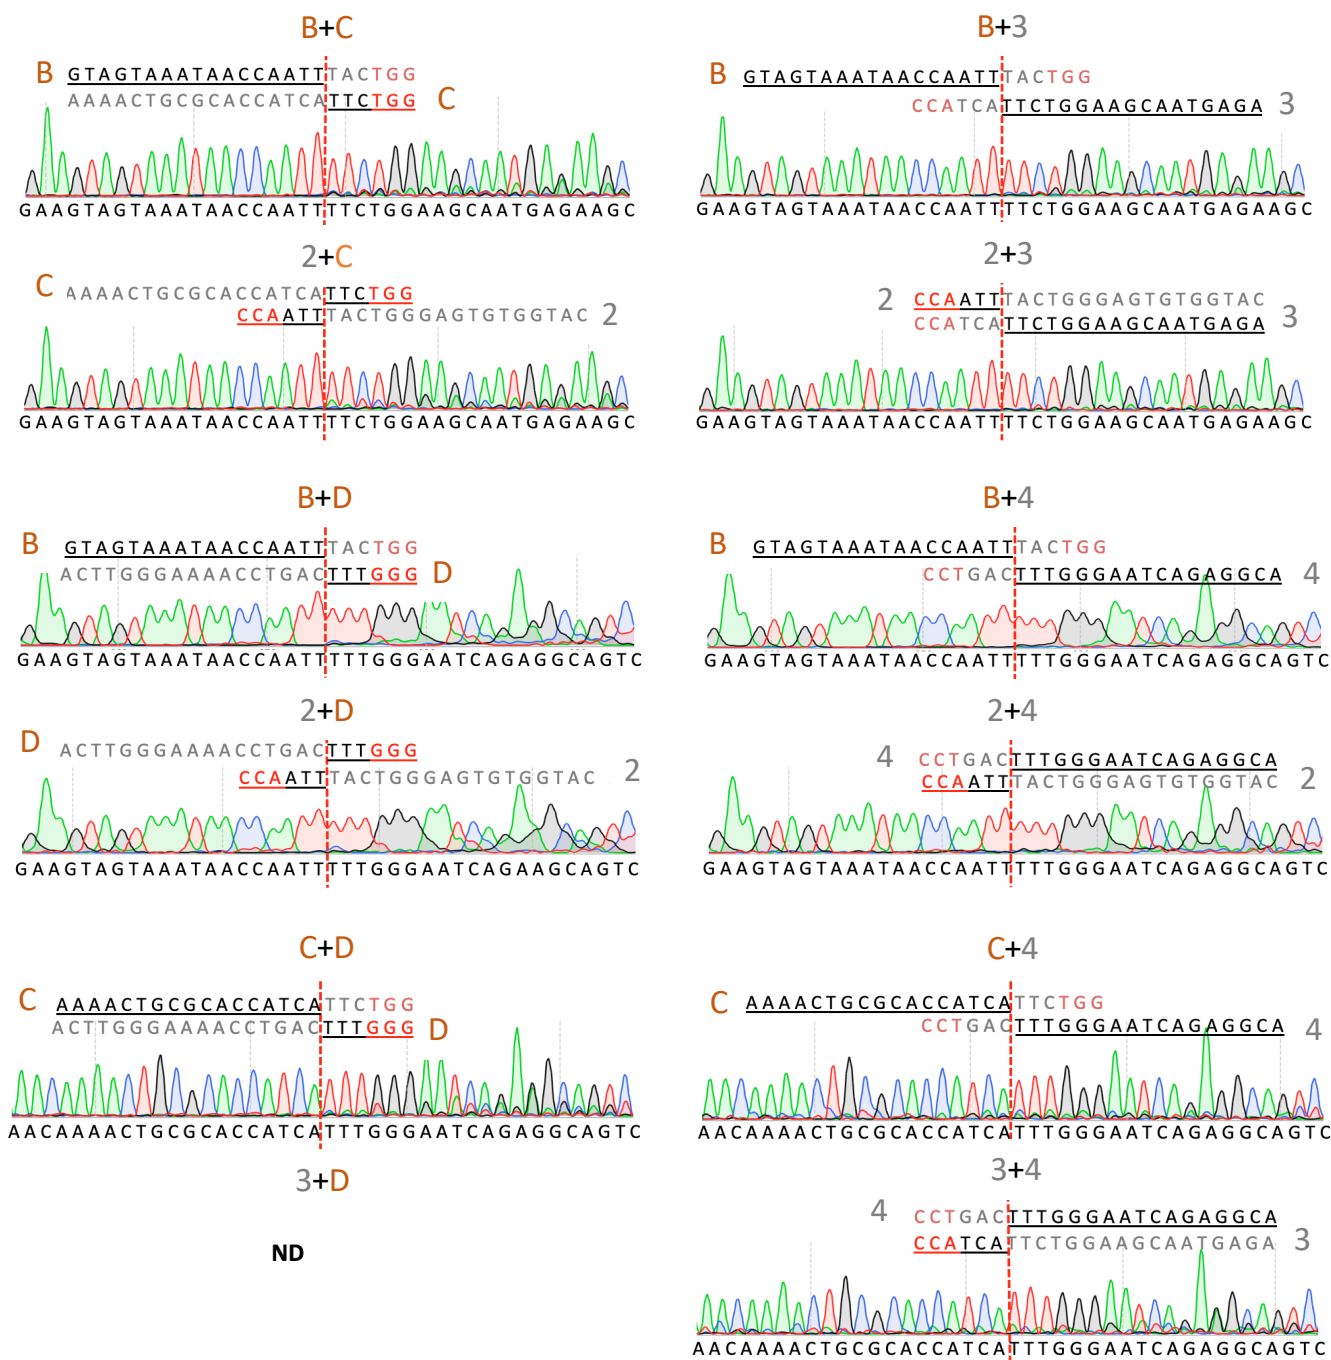

**Figure S3**

Supporting Sanger sequencing chromatograms of the deletion PCR productions shown in Figure 4B (highlighted with asterisks). ND, Sanger sequencing results not available due to poor signals.

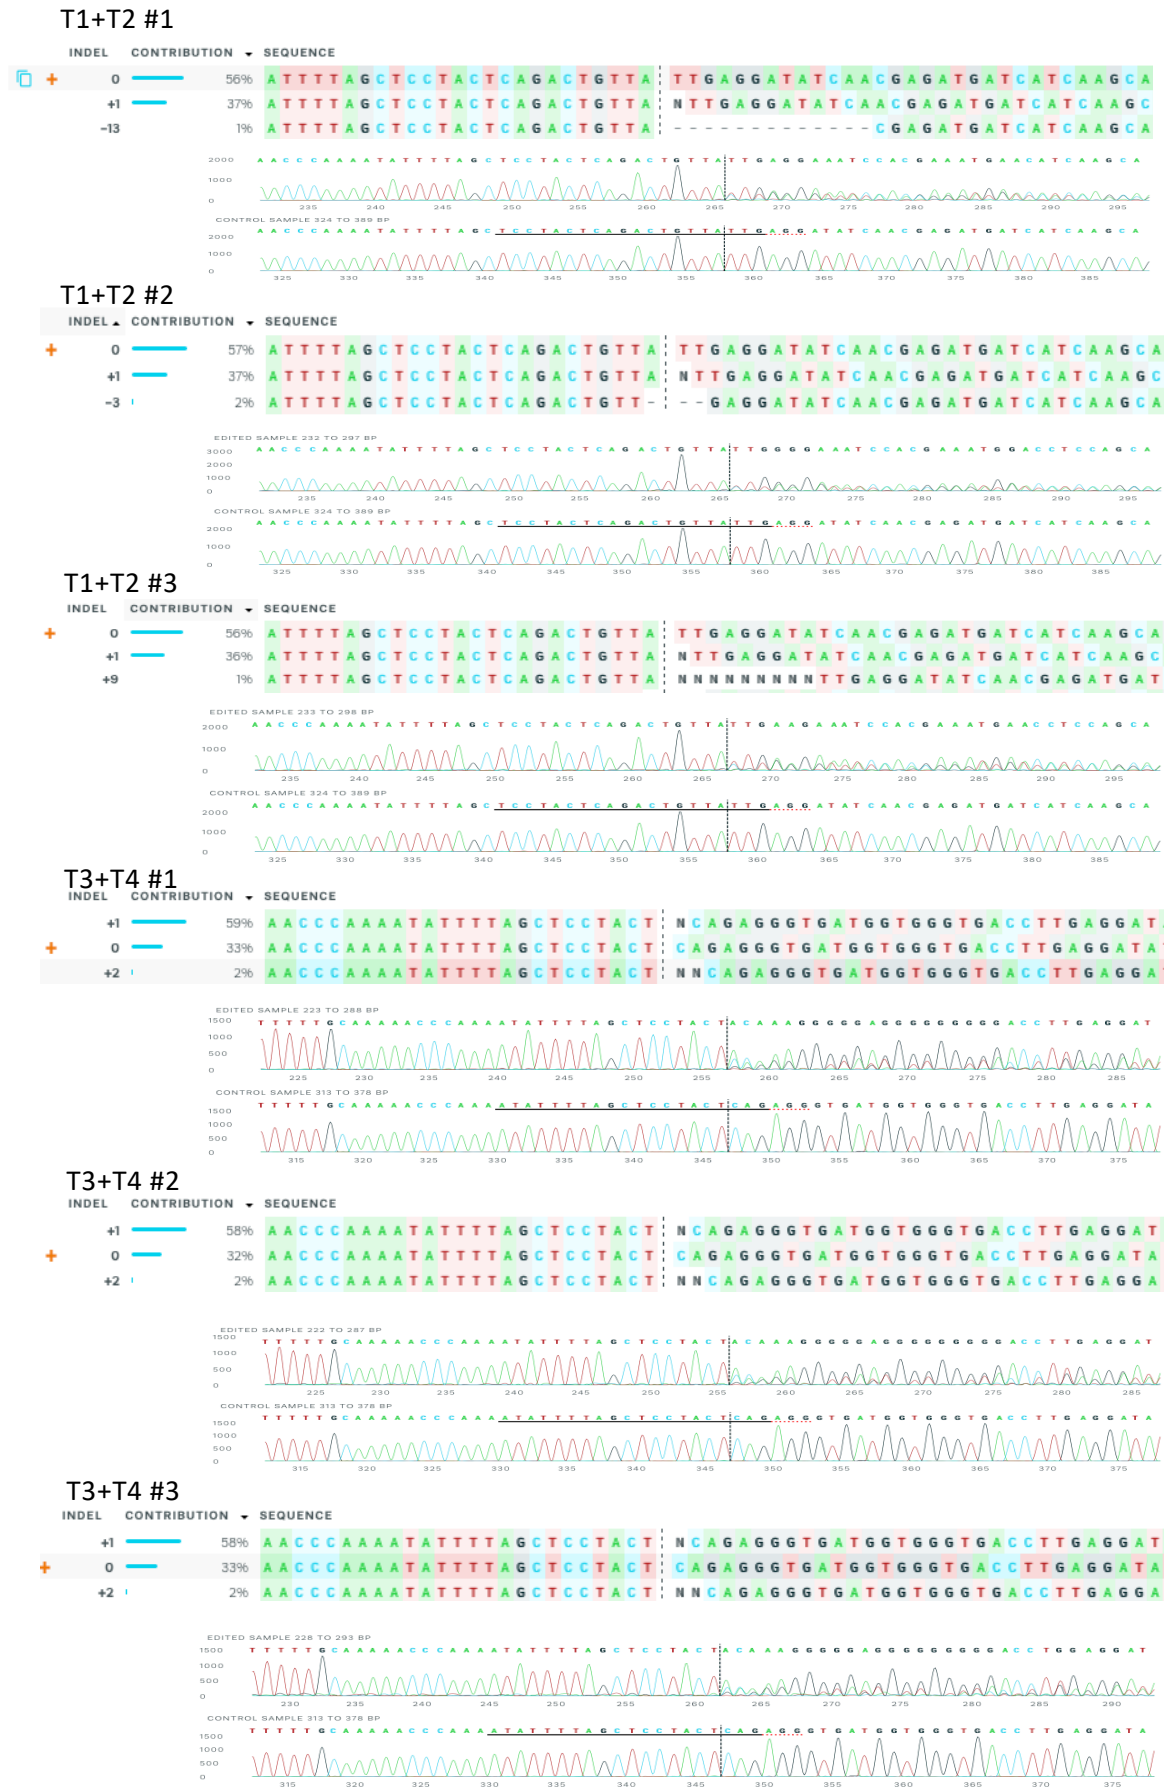

**Figure S4**

Supporting Sanger sequencing and ICE analysis results of the deletion PCR products of DMD exon 51 from the pool of CRISPR edited HEK293T cells in Figure 5c.

# NHBEJ efficiency of gR1+3 nucleofected cell pools

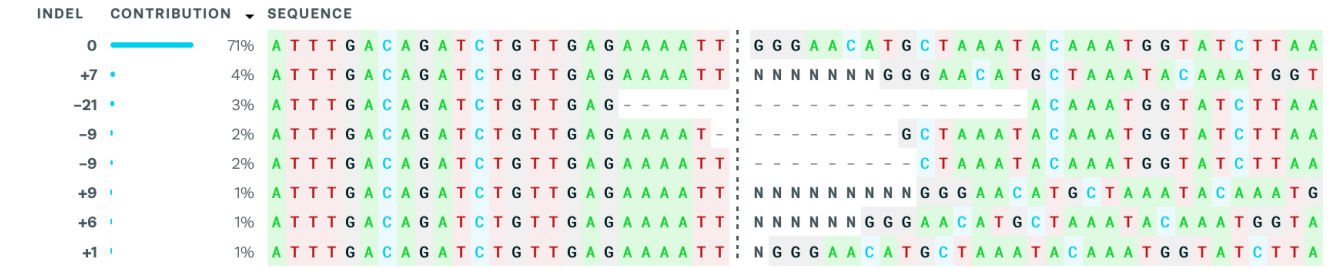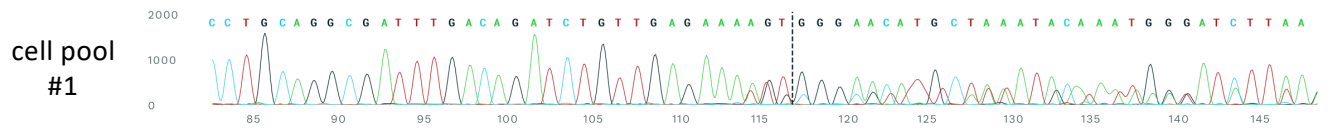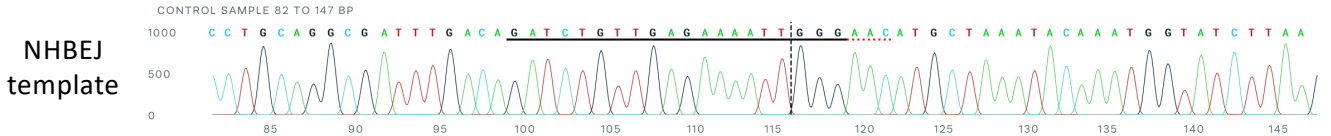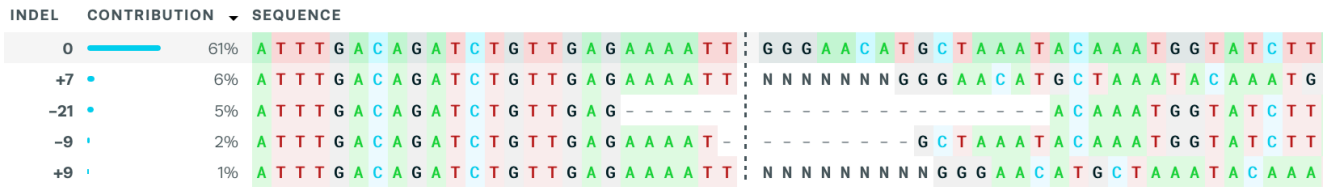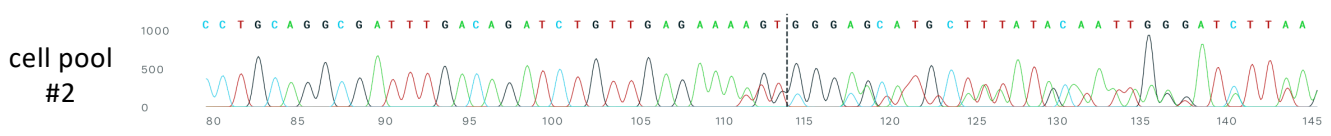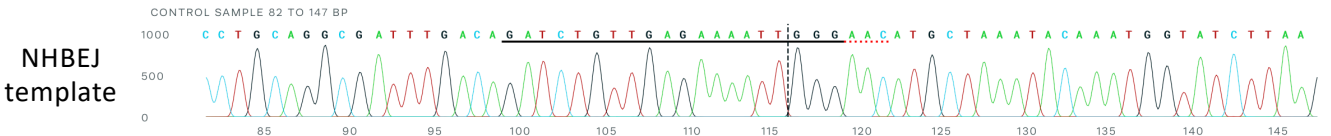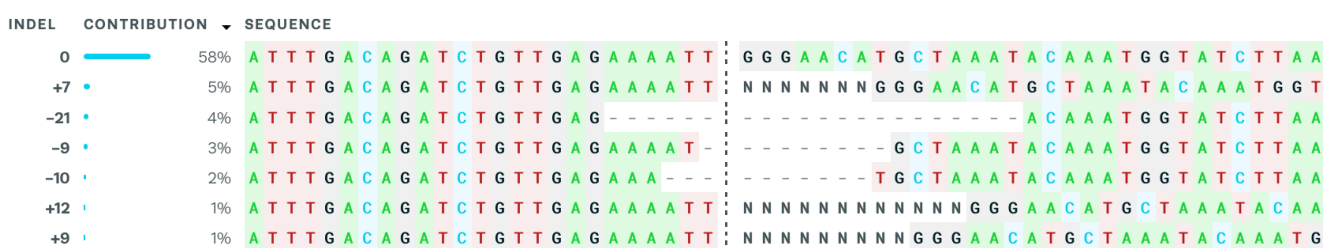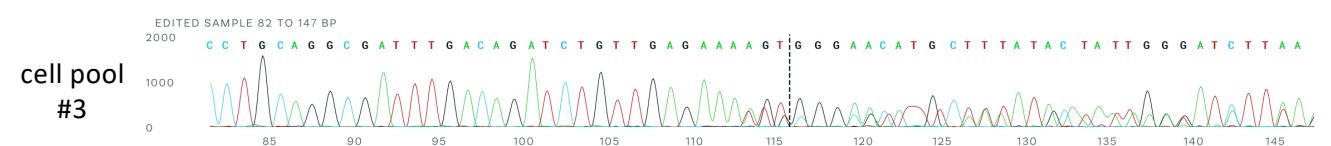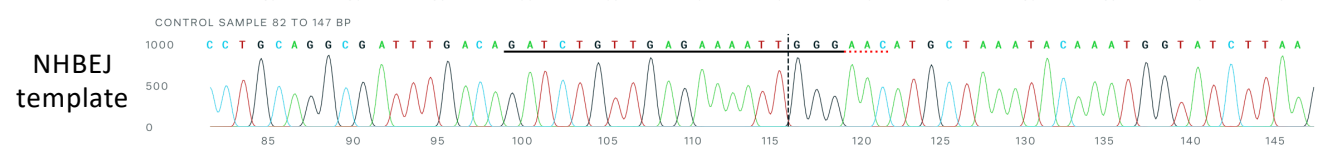

# NHBEJ efficiency of gR2+3 nucleofected cell pools

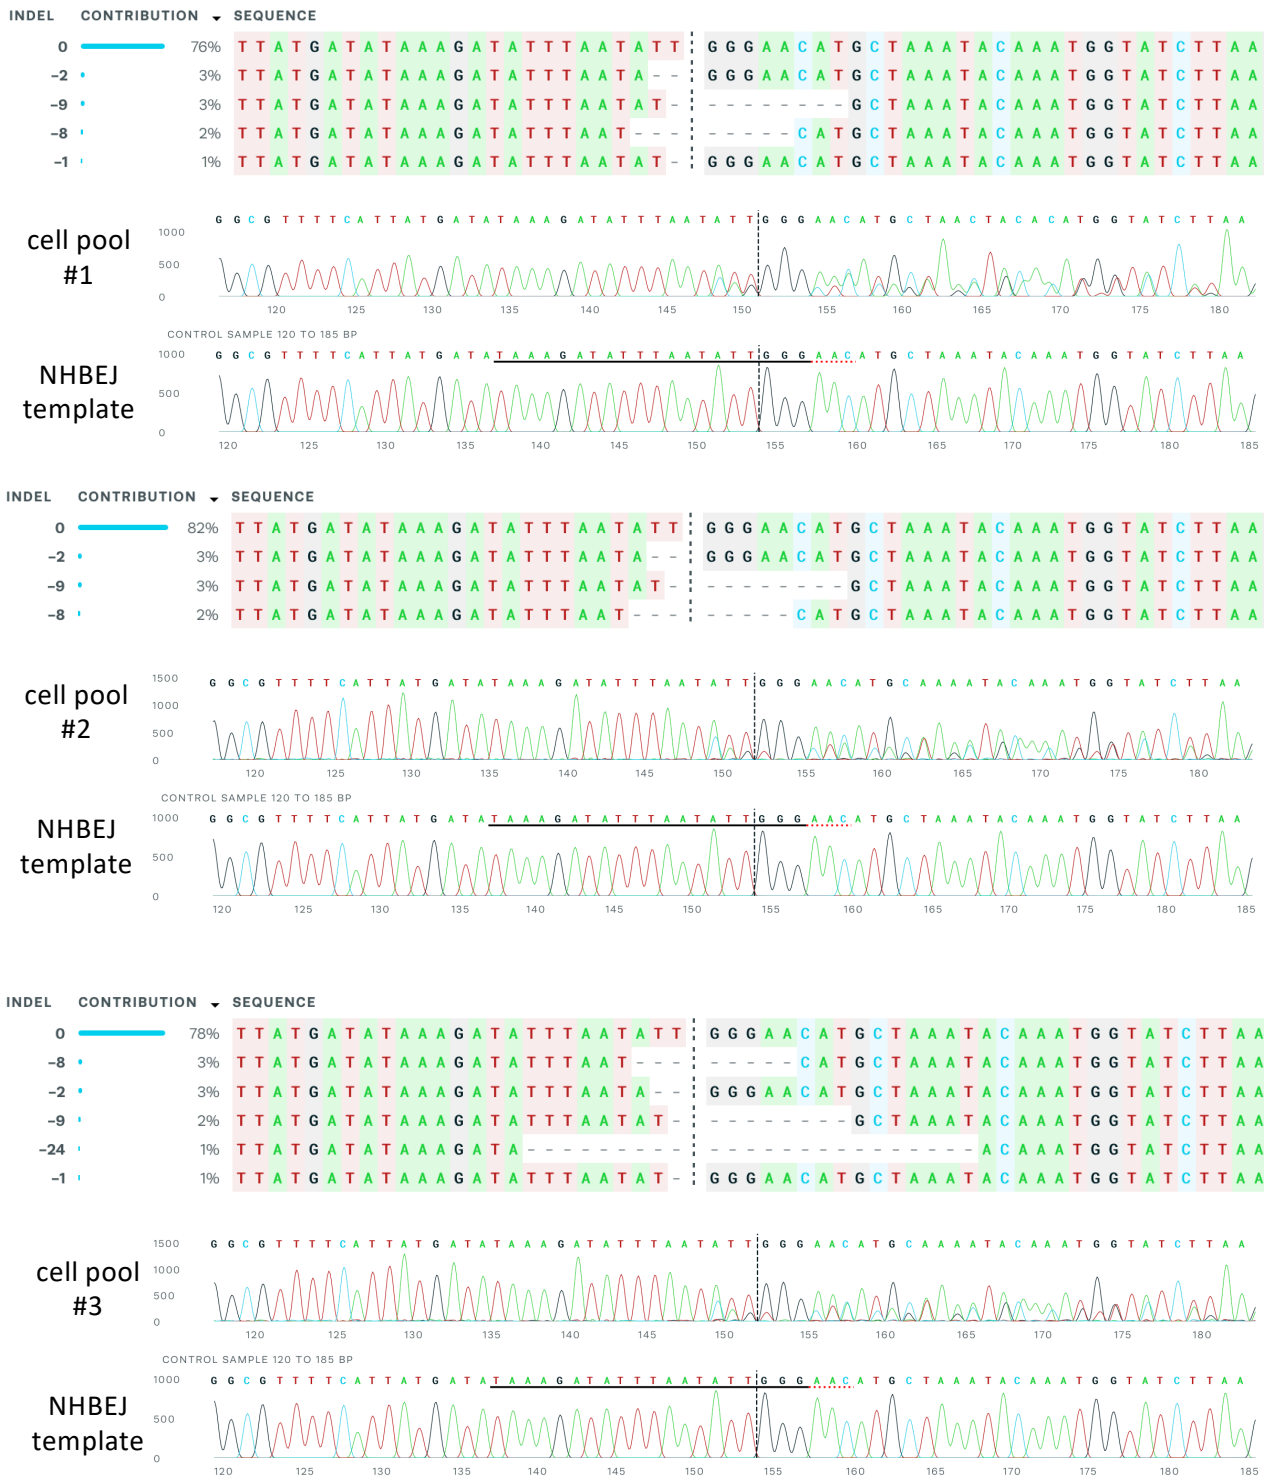

**Figure S5**  
Supporting Sanger sequencing and ICE analysis results of the deletion PCR products of DMD exon 44 from the pool of CRISPR edited DMD ex45del fibroblast cells in Figure 6b.



**a**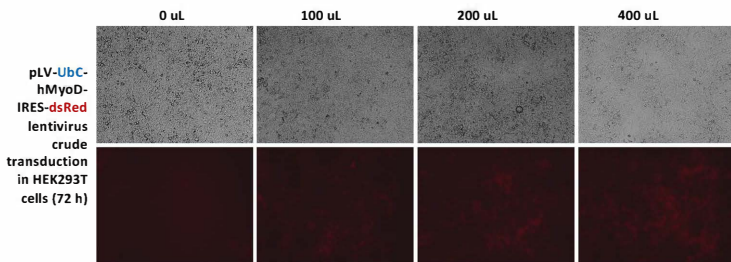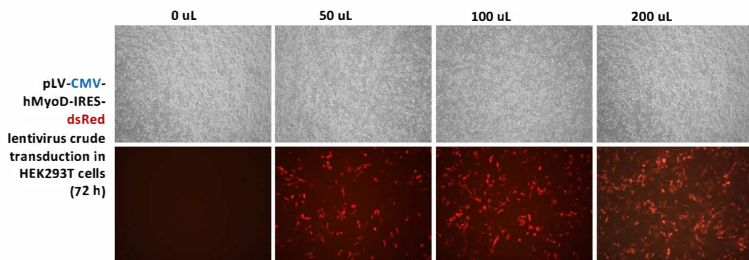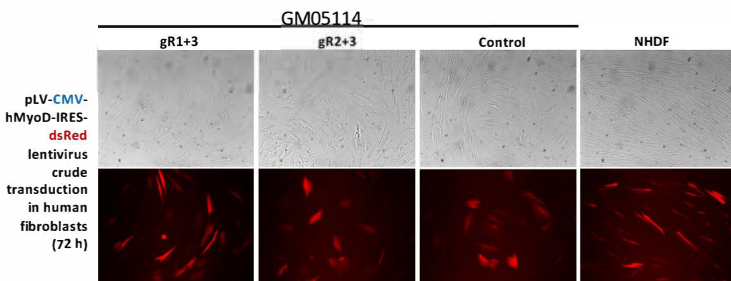**b**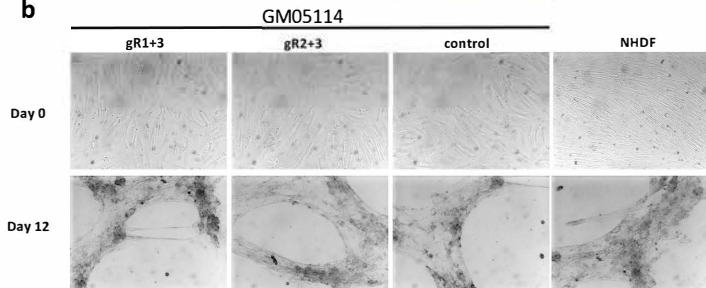

**C**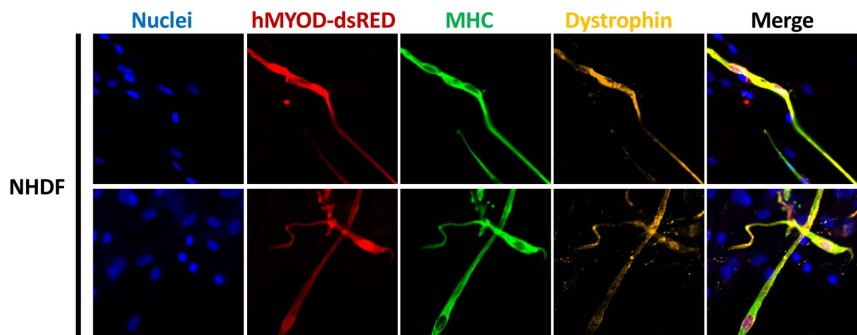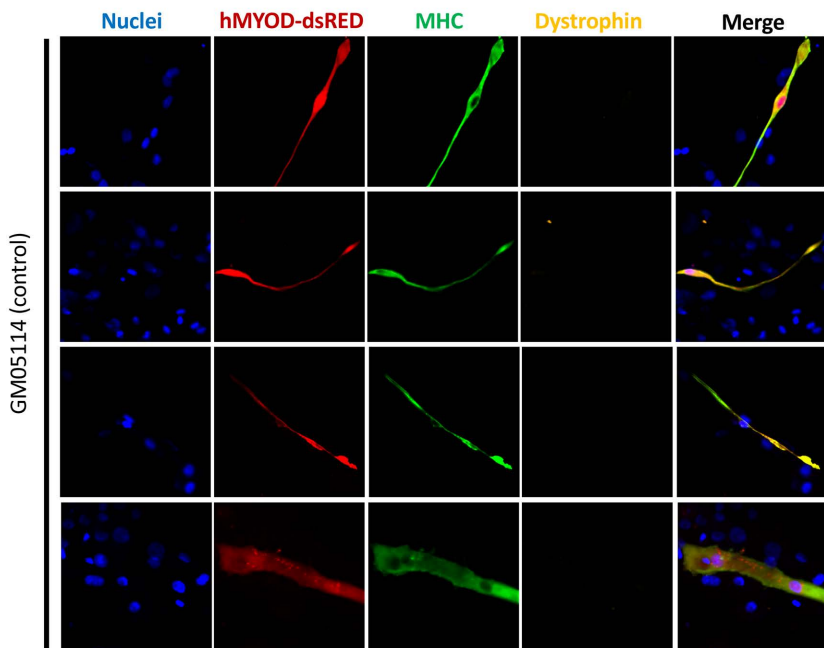

c (continued)

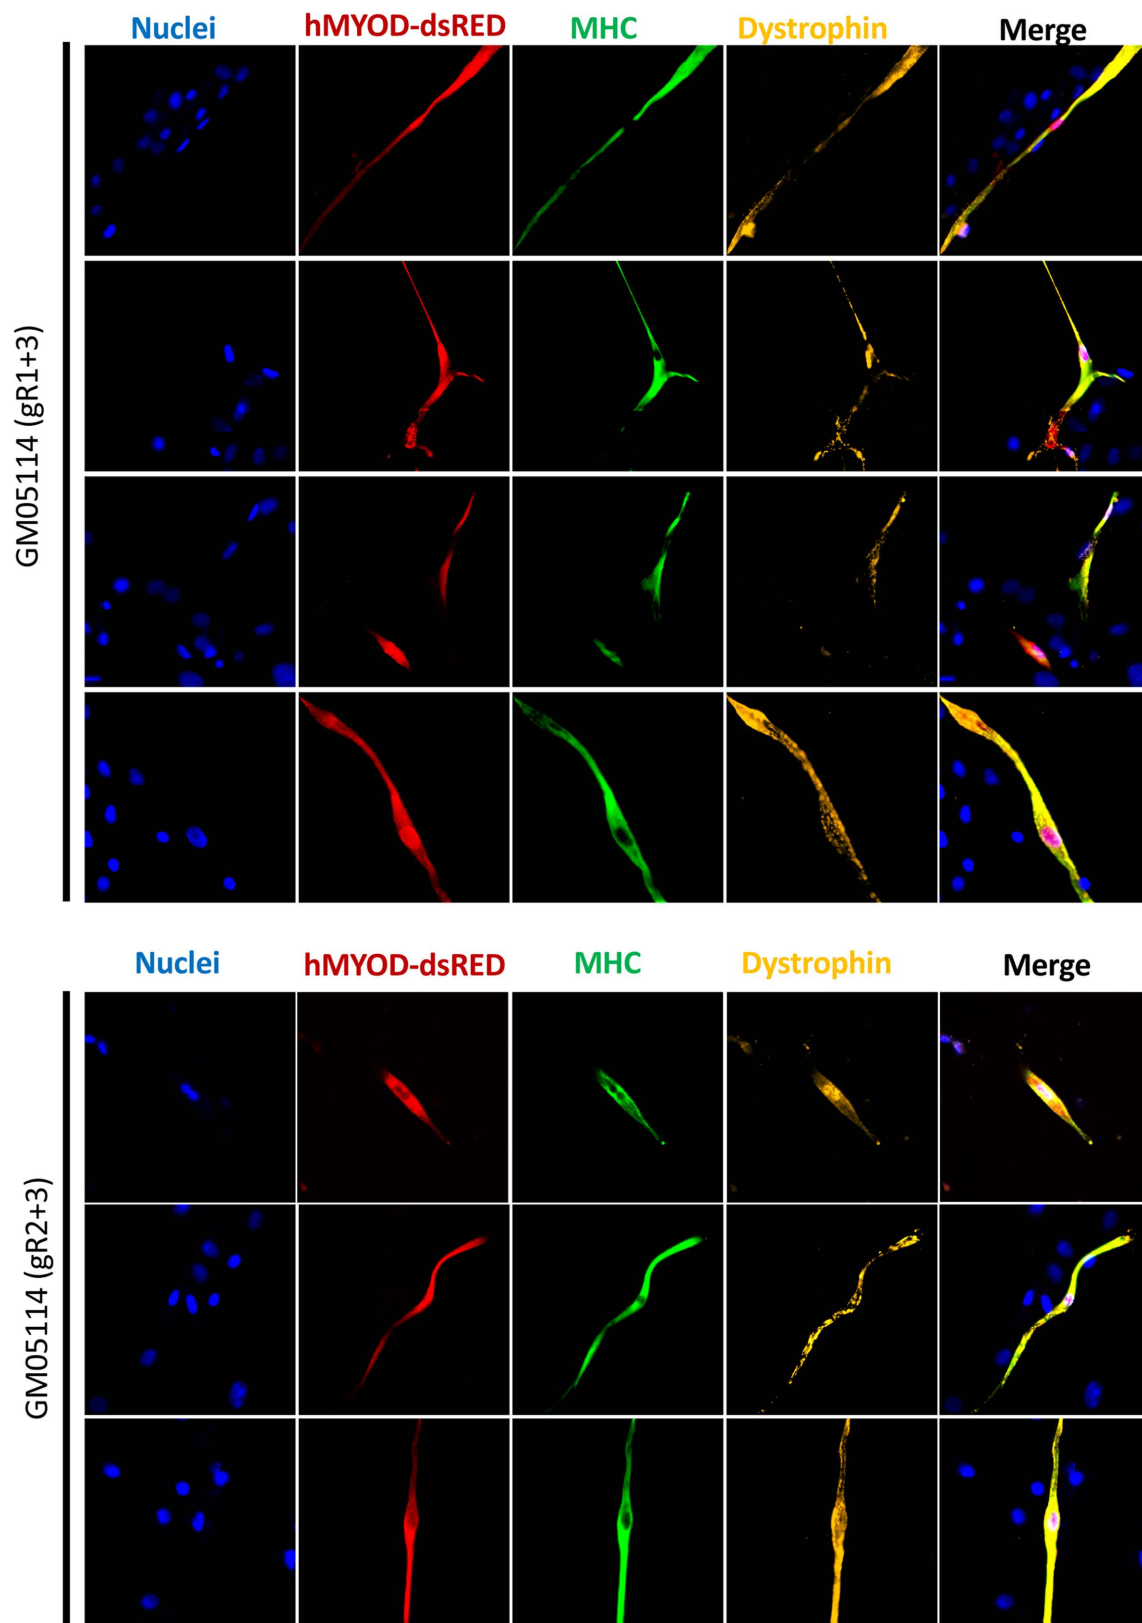

**Figure S6**

Direct reprogramming and validation of DMD expression in myotubes.

(a) Evaluation of transduction efficiency in HEK293T cells and fibroblasts.

(b) Morphological changes in cell culture before and after direct reprogramming.

(c) Extended representative fluorescence immunostaining images stained with antibodies against MHC and dystrophin. MYOD expression is detected with dsRED. Nuclear, DAPI. Magnification, 40X.

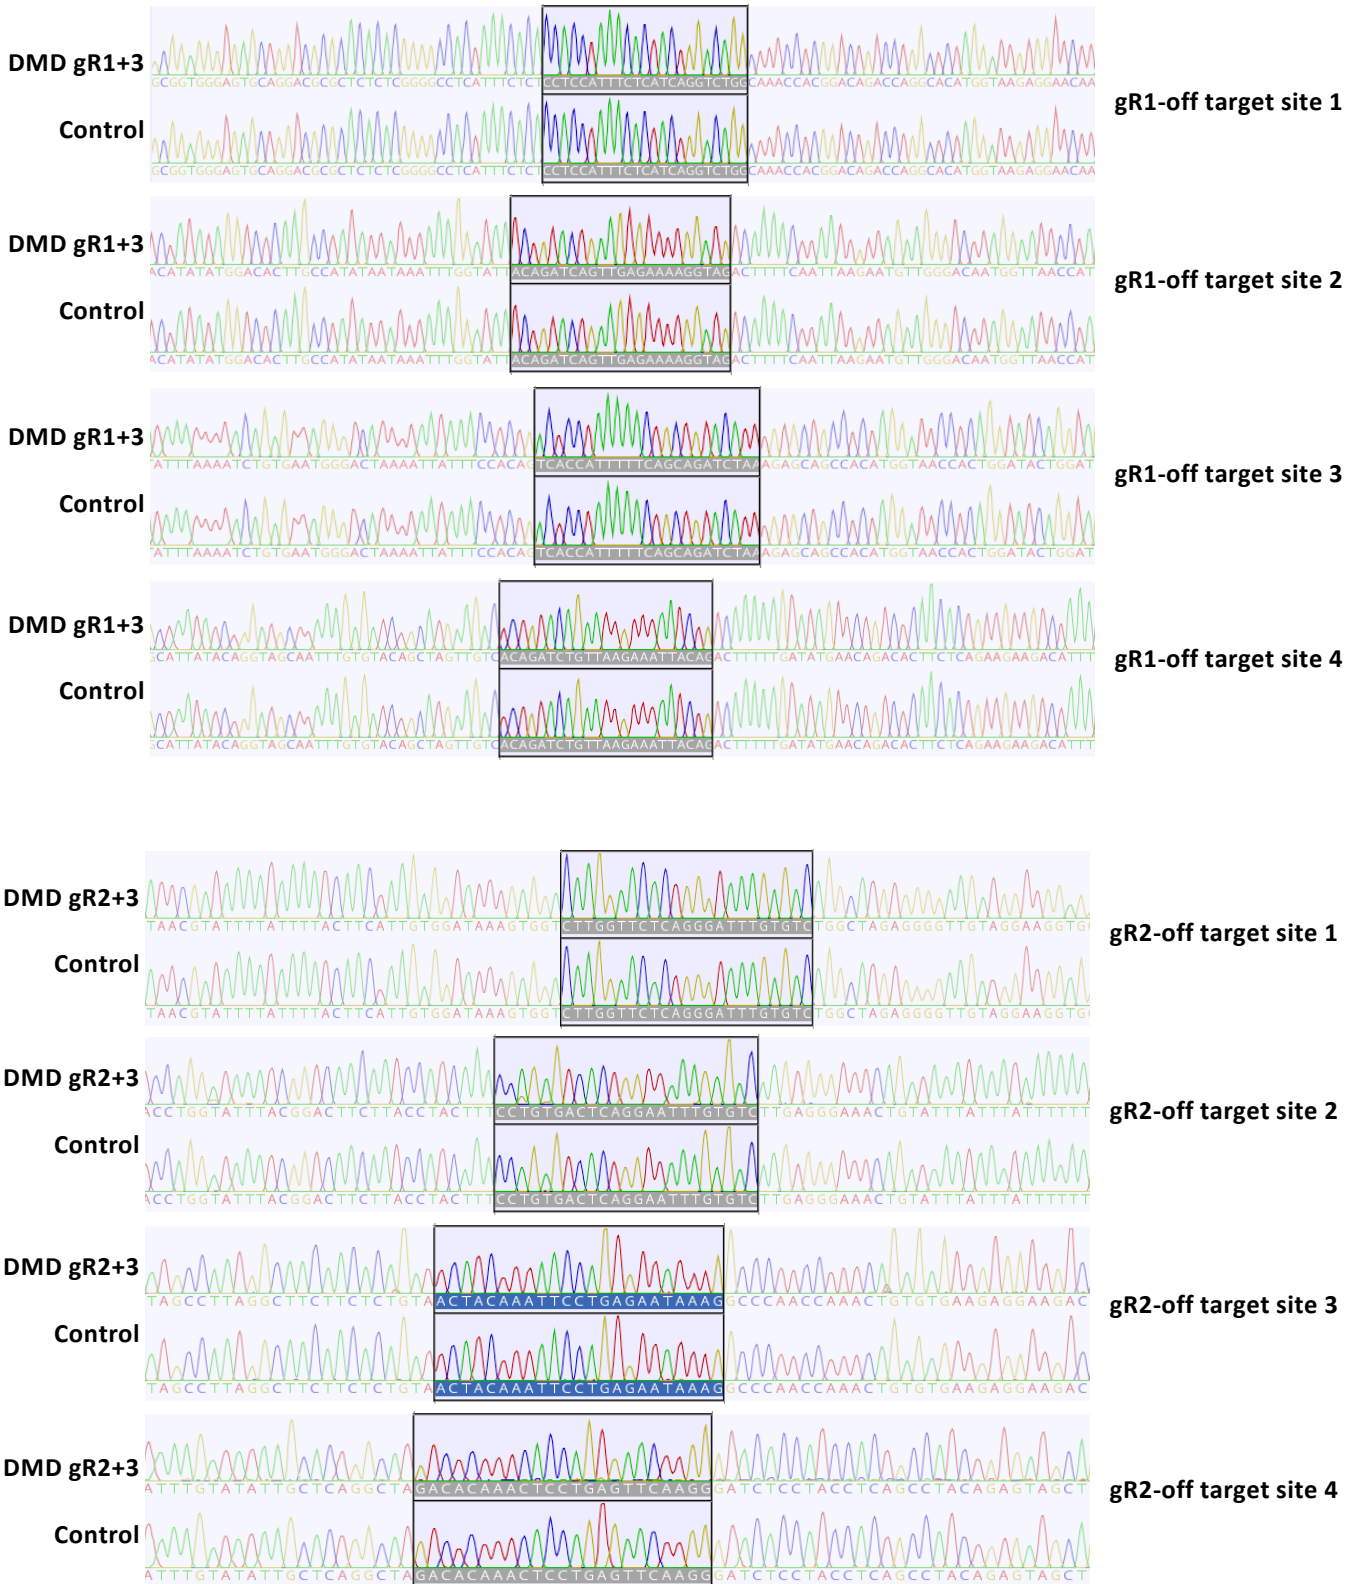

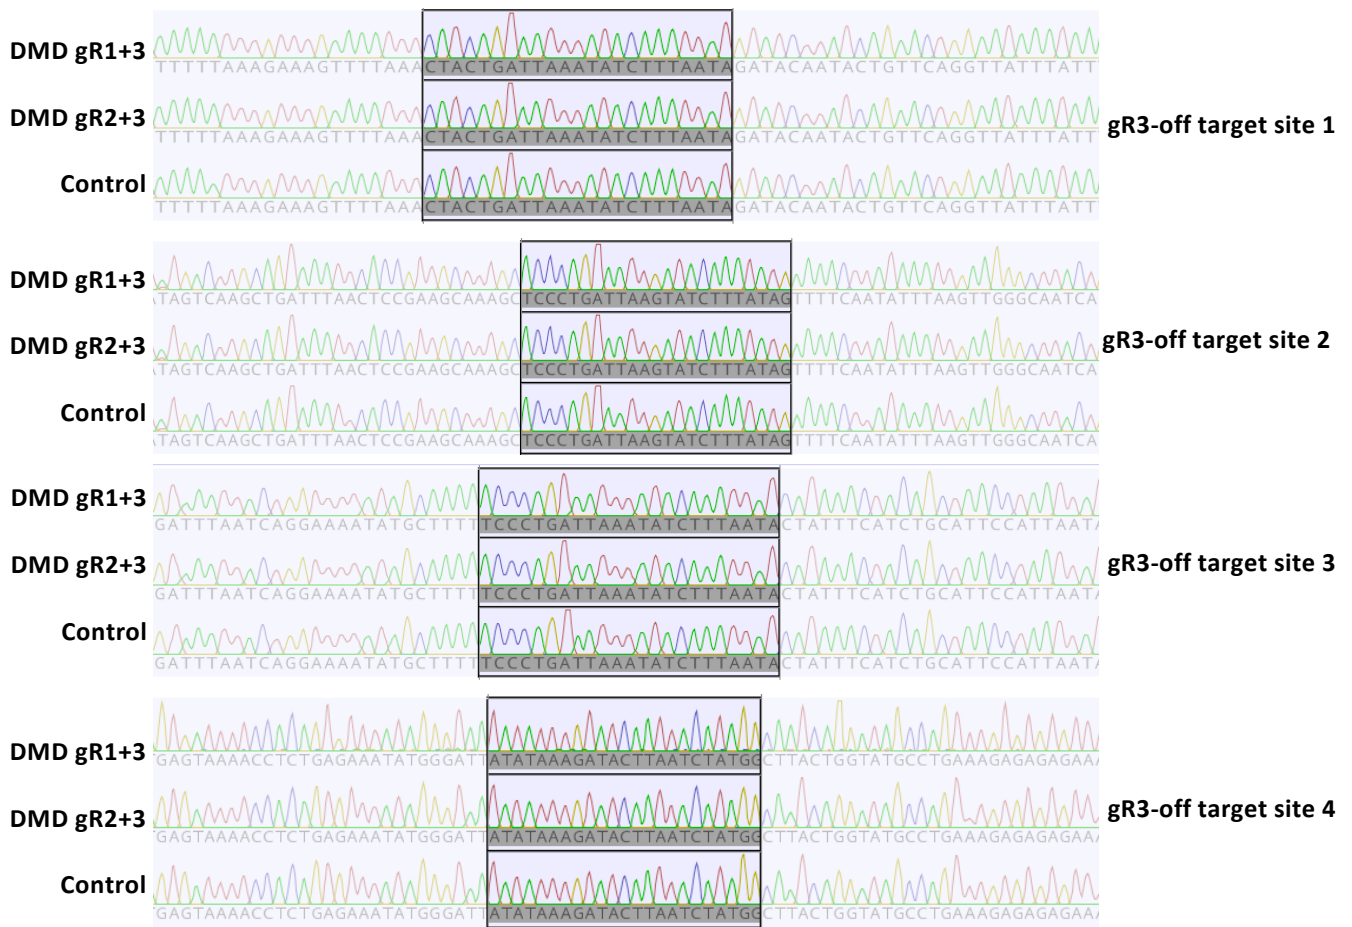

**Figure S7**

Sanger sequencing chromatograms results for validation of the top 4 predicted off-target sites for the three DMD exon 44 targeting gRNAs. Genome DNA used for Sanger sequencing are from the CRISPR-edited DMD ex45del fibroblasts. Off-target sites are predicted with CRISPRspec.

| CRISPR-B                           | gRNA name     | gRNA sequence           | Target locus             |
|------------------------------------|---------------|-------------------------|--------------------------|
| P1                                 | P1-gRNA1      | CCAAGGTTAAGGGCACTTCAGAA | Upstream of <i>TTR</i>   |
|                                    | P1-gRNA2      | CCCTTTGCATCCAGCAGAAGAGG | <i>TTR</i> intron        |
| P2                                 | P2-gRNA1      | CCAAGGTTAAGGGCACTTCAGAA | Upstream of <i>TTR</i>   |
|                                    | P2-gRNA2      | TTGCCAAGAACCCTCCCACAGG  | <i>TTR</i> intron        |
| P3                                 | P3-gRNA1      | CCAAGGTTAAGGGCACTTCAGAA | Upstream of <i>TTR</i>   |
|                                    | P3-gRNA2      | TGTTTCACAGATAATGGCAGAGG | Downstream of <i>TTR</i> |
| P4                                 | P4-gRNA1      | GCACCTCTCCTTGTTAGTAGGG  | <i>CREB</i> intron       |
|                                    | P4-gRNA2      | GTAAATGGTGCTCTCAGATAAGG | <i>CREB</i> intron       |
| P5                                 | P5-gRNA1      | CCATAGGTATCTATGCCAGCAGC | <i>CREB</i> intron       |
|                                    | P5-gRNA2      | TGTATAGTCACCTTATGTATAGG | <i>CREB</i> intron       |
| P6                                 | P6-gRNA1      | ATGTAAGATCCAGCGGACATAGG | <i>CREB</i> intron       |
|                                    | P6-gRNA2      | TGCACTCCAACCAGTTAGCCAGG | <i>CREB</i> intron       |
| P7                                 | P7-gRNA1      | CCAGCTTTACTCGCACAGCCTCC | <i>STAT2</i> intron      |
|                                    | P7-gRNA2      | CCAGGCAGGAAGCTGCACTGGG  | <i>STAT2</i> intron      |
| P8                                 | P8-gRNA1      | CCCTTGTCCAACCACTGCTAGAC | <i>IRF9</i> intron       |
|                                    | P8-gRNA2      | AACTGGGTGGGCCTAAGGGCAGG | <i>IRF9</i> intron       |
| DMD-int44-R1                       | A             | ACCATCTGTTGCCCTTCACTGGG | <i>DMD</i> intron 44     |
|                                    | 1             | CCCTTCACTGGGACCCTAACGTT | <i>DMD</i> intron 44     |
| DMD-int44-R2                       | B             | GTAGTAAATAACCAATTTACTGG | <i>DMD</i> intron 44     |
|                                    | 2             | CCAATTTACTGGGAGTGTGGTAC | <i>DMD</i> intron 44     |
| DMD-int44-R3                       | C             | AAAAGTGCACCATCATTCTGG   | <i>DMD</i> intron 44     |
|                                    | 3             | CCATCATTCTGGAAGCAATGAGA | <i>DMD</i> intron 44     |
| DMD-int44-R4                       | D             | ACTTGGGAAAACCTGACTTTGGG | <i>DMD</i> intron 44     |
|                                    | 4             | CCTGACTTTGGGAATCAGAGGCA | <i>DMD</i> intron 44     |
| DMD-EX51 NHBEJ-gRNAs               | DMDexon51-T1  | TCCTACTCAGACTGTTACTCTGG | <i>DMD</i> exon 51       |
|                                    | DMDexon51-T2  | GGTGATGGTGGGTGACCTTGAGG | <i>DMD</i> exon 51       |
|                                    | DMDexon51-T3  | ACCAGAGTAACAGTCTGAGTAGG | <i>DMD</i> exon 51       |
|                                    | DMDexon51-T4  | ATCAAGTTATAAAATCACAGAGG | <i>DMD</i> exon 51       |
| DMD EX44 NHBEJ gRNAs (Synthesized) | DMDexon44-gR1 | acagatctgttgagaaatggCGG | <i>DMD</i> exon 44       |
|                                    | DMDexon44-gR2 | atataaagatattaatcagTGG  | <i>DMD</i> exon 44       |
|                                    | DMDexon44-gR3 | gacacaaattcctgagaattGGG | <i>DMD</i> exon 44       |

**Table S1. gRNAs used in this study**

| Primer name      | 5'-3' sequence            | Wildtype length (bp) | CRISPR-B length (bp) |
|------------------|---------------------------|----------------------|----------------------|
| P1-F             | GGGTGATGGTGATCACACCACT    | 31690                | 486                  |
| P1-R             | GGTTACAGGACTATTCTAAGGG    |                      |                      |
| P2-F             | GGGTGATGGTGATCACACCACT    | 30855                | 473                  |
| P2-R             | CATTTAGGGGCAGACAGTAGAG    |                      |                      |
| P3-F             | GGGTGATGGTGATCACACCACT    | 58658                | 479                  |
| P3-R             | CTGAGAAAATACGTGCTGGAGAA   |                      |                      |
| P4-F             | AACGGGCTGATTTTGTCTAC      | 1281                 | 581                  |
| P4-R             | CCACCTTTCTCATTCTATC       |                      |                      |
| P5-F             | CCACCTTTCTCATTCTATC       | 812                  | 664                  |
| P5-R             | CTCCAAACACTTCCACT         |                      |                      |
| P6-F             | TGTCGTGGCAAGAGTCTACT      | 1084                 | 439                  |
| P6-R             | TGTCCGTAACATGGTATTCTTAGA  |                      |                      |
| P7-F             | ATTTGTTCCCGTCTCCCT        | 773                  | 547                  |
| P7-R             | AGAATATGCACCAAAGTGA       |                      |                      |
| P8-F             | CAGCTAAGACCATGTCCGG       | 707                  | 329                  |
| P8-R             | GGTCCAGCTGTCTGGAAGAC      |                      |                      |
| DMDintron44For   | TAGGATACACCTAACATGGCAATC  | See table S3         | See table S3         |
| DMDintron44Rev   | TGGTATTCTGGGATATACGACCAC  |                      |                      |
| DMD-R1-1         | ATGCCATGCTGGACAACGGAAG    |                      |                      |
| gR1-F            | ACCATCTGTTGCCCTTCACT      |                      |                      |
| DMD-R2-1         | ACACGAAGATCAATATGGCTGG    |                      |                      |
| DMD-exon51-F     | ACTTGTCCAGGCATGAGAATGAG   | 667                  | See figure 5         |
| DMD-exon51-R     | TATACTTAGGCTGAATAGTGAGAG  |                      |                      |
| DMD-exon44-F     | TGCAGGAAACTATCAGAGTGAT    | 358                  | gR1+3: 267 bp        |
| DMD-exon44-R     | ATCACCTTCAGAACCTGATCT     |                      | gR2+3: 306 bp        |
| DMD-EX45del-RT-F | GCAAGAAGACAGCAGCATTGCA    | 552                  | gR1+3: 376+288 bp    |
| DMD-EX45del-RT-R | CAGGTTCAAGTGGGATACTAGC    |                      | gR2+3: 376+324 bp    |
| hGAPDH-RT-F      | TGGTATCGTGGAAAGGACTCATGAC | 189                  |                      |
| hGAPDH-RT-R      | ATGCCAGTGAGCTTCCCGTTCAGC  |                      |                      |

**Table S2. Primers used in this study**

| DMD-int 44 pair-gRNAs | Primers combination | WT length (bp) | Length after del (bp) |
|-----------------------|---------------------|----------------|-----------------------|
| <b>A+B</b>            | DMD-For + DMD-R1-1  | 846            | 432                   |
| <b>A+2</b>            | DMD-For + DMD-R1-1  | 846            | 432                   |
| <b>A+C</b>            | DMD-For + DMD-Rev   | 2431           | 1634                  |
| <b>A+3</b>            | DMD-For + DMD-Rev   | 2431           | 1634                  |
| <b>A+D</b>            | DMD-For + DMD-Rev   | 2431           | 538                   |
| <b>A+4</b>            | DMD-For + DMD-Rev   | 2431           | 538                   |
| <b>1+B</b>            | DMD-For + DMD-R1-1  | 846            | 432                   |
| <b>1+2</b>            | DMD-For + DMD-R1-1  | 846            | 432                   |
| <b>1+C</b>            | DMD-For + DMD-Rev   | 2431           | 1634                  |
| <b>1+3</b>            | DMD-For + DMD-Rev   | 2431           | 1634                  |
| <b>1+D</b>            | DMD-For + DMD-Rev   | 2431           | 538                   |
| <b>1+4</b>            | DMD-For + DMD-Rev   | 2431           | 538                   |
| <b>B+C</b>            | gR1-F + DMD-R2-1    | 937            | 554                   |
| <b>B+3</b>            | gR1-F + DMD-R2-1    | 937            | 554                   |
| <b>B+D</b>            | DMD-For + DMD-Rev   | 2431           | 952                   |
| <b>B+4</b>            | DMD-For + DMD-Rev   | 2431           | 952                   |
| <b>2+C</b>            | gR1-F + DMD-R2-1    | 937            | 554                   |
| <b>2+3</b>            | gR1-F + DMD-R2-1    | 937            | 554                   |
| <b>2+D</b>            | DMD-For + DMD-Rev   | 2431           | 952                   |
| <b>2+4</b>            | DMD-For + DMD-Rev   | 2431           | 952                   |
| <b>C+D</b>            | DMD-For + DMD-Rev   | 2431           | 1335                  |
| <b>C+4</b>            | DMD-For + DMD-Rev   | 2431           | 1335                  |
| <b>3+D</b>            | DMD-For + DMD-Rev   | 2431           | 1335                  |
| <b>3+4</b>            | DMD-For + DMD-Rev   | 2431           | 1335                  |

**Table S3. gRNAs combinations used for PAM direction and cleavage sites influence tests**



| gRNA | TargetSeq                | Mismatches | CRISPRoff   | Coordinates                                 | PCR primers-F          | PCR primers-R          | PCR length |
|------|--------------------------|------------|-------------|---------------------------------------------|------------------------|------------------------|------------|
| 1    | ACAGATCTGTTGAGAAATGGCGG  | 0          | 0.842361111 | <a href="#">chrX:32217032-32217055:-</a>    |                        |                        |            |
|      | cCAGAcCTGaTGAGAAATGGAGG  | 3          | 0.436805556 | <a href="#">chr14:105469449-105469472:-</a> | TCTCTTGCTGGCCAGAGAGCTG | TGGCCAGGCCTCTTCCCAACAC | 324 bp     |
|      | ACAGATCaGTTGAGAAAaGGTAG  | 2          | 0.370833333 | <a href="#">chr1:110926988-110927011:+</a>  | GCCAACAGATGGCATTATGG   | GAAGTTCAGATCCCTGGAGC   | 566 bp     |
|      | ttAGATCTGcTGAAaAAATGGTGA | 4          | 0.360416667 | <a href="#">chr1:213519718-213519741:-</a>  | GCAGCTGCGTGGTACTAGAGAC | GGCAGAAGCTGTGTGATCTCTC | 382 bp     |
|      | ACAGATCTGTTaAGAAATtaCAG  | 3          | 0.354861111 | <a href="#">chr15:49317220-49317243:+</a>   | GCTGGGAGATCCTGAGAAGTG  | AGGAATCGCCACACTGTCTCC  | 386 bp     |
| 2    | ATATAAAGATATTTAATCAGTGG  | 0          | 0.5375      | <a href="#">chrX:32216996-32217019:-</a>    |                        |                        |            |
|      | tatTAAAGATATTTAATCAGTAG  | 3          | 0.294444444 | <a href="#">chrX:27845602-27845625:-</a>    | GGTATTAGAGTGATGATAGCC  | ATTGGCCTCTAGCCAGGATGAT | 432 bp     |
|      | cTATAAAGATAcTTAATCAGGGA  | 2          | 0.25625     | <a href="#">chr11:34402257-34402280:-</a>   | CCTGTGTATGGATAGTTTGAG  | AGTCCTGTACAGAGCATGGCTA | 397 bp     |
|      | tatTAAAGATATTTAATCAGGGA  | 3          | 0.268055556 | <a href="#">chr12:69493880-69493903:-</a>   | TGGCAAATGATAGCACTTGTC  | TGTAGCCTCAGCGTCTAGCAC  | 407 bp     |
|      | tatTAAAGATAcTTAATCAGAAAG | 4          | 0.234027778 | <a href="#">chr6:87404961-87404984:+</a>    | GGTTGGTCTCAAACCTGACC   | GAAGGCATGAGAAGCTTCTCAG | 437 bp     |
| 3    | GACACAAATTCCTGAGAATTGGG  | 0          | 0.761111111 | <a href="#">chrX:32216944-32216967:-</a>    |                        |                        |            |
|      | GACACAAATcCCTGAGAAccAAG  | 3          | 0.472916667 | <a href="#">chr6:483275-483298:-</a>        | CCTCACTGCTATTTAAGCCAG  | CTAGACAAAGTGGCAGTGAAG  | 362 bp     |
|      | GACACAAATTCCTGAGTcacAGG  | 4          | 0.438194444 | <a href="#">chr21:41452561-41452584:-</a>   | CATCTGTGGCTCAAGCCTCTG  | CTCCATGGAAGAGTCTGTTGCC | 432 bp     |
|      | actACAAATTCCTGAGAATaAAG  | 4          | 0.398611111 | <a href="#">chr7:43654891-43654914:+</a>    | TGTAGAACATGTTCCAGTCCG  | AATTGGTCTCAGTGCATGCTGC | 326 bp     |
|      | ccCACAAAcTCCTGAGAATaCGG  | 4          | 0.390277778 | <a href="#">chr2:52810266-52810289:+</a>    | GGAGATAACCAATGAGACTG   | CAGAACAGCATACAGGTTGAC  | 435 bp     |

Table S4, top 4 predicted potential off-targets by CRISPRspec
